# Supplementary material
Source: publisher figshare collection journal article supplement (https://frontiersin.figshare.com/ndownloader/files/13235480)
Supplement: Supplementary file 1 [file 13235480]

## Sheet: TableS3
Table S3.
		Manual curation of taxonomic groups:		Protist Ribosomal 2 database designations:
OTU.ID	Significant diel rhythmicity based on rDNA or rRNA reads:	Taxa	Taxa2	Level1	Level2	Level3	Level4	Level5	Level6	Level7	Level8
AAYZ01590113.200.1673_U	DNA	Opisthokont-Metazoa	Craniata	Eukaryota	Opisthokonta	Metazoa	Craniata	Craniata_X	Mammalia	Ochotona	Ochotona_princeps;
AB001438.1.1662_U	DNA	Alveolates-Dinoflagellates	Karlodinium	Eukaryota	Alveolata	Dinophyta	Dinophyceae	Suessiales	Suessiales_X	Karlodinium	Karlodinium_sp.;
AB017125.1.1756_U	DNA	Archaeplastids-Chlorophytes	Pyramimonadales	Eukaryota	Archaeplastida	Chlorophyta	Pyramimonadales	Pyramimonadales_X	Pyramimonadales_XX	Halosphaera	Halosphaera_sp.;
AB179736.1.1725_U	DNA	Rhizaria-Polycystines	Pterocorys	Eukaryota	Rhizaria	Radiolaria	Polycystinea	Nassellaria	Pterocoryothoidea	Pterocorys	Pterocorys_zancleus;
AB183604	DNA	Haptophytes	Hymenomonadaceae	Eukaryota	Hacrobia	Haptophyta	Prymnesiophyceae	Coccolithales	Hymenomonadaceae	Ochrosphaera	Ochrosphaera_sp.;
AB265964.1.1755_U	DNA	Alveolates-Dinoflagellates	Gymnodinium	Eukaryota	Alveolata	Dinophyta	Dinophyceae	Dinophyceae_X	Dinophyceae_XX	Gymnodinium	Gymnodinium_microreticulatum;
AF022196.1.1803_U	DNA	Alveolates-Dinoflagellates	Gymnodinium	Eukaryota	Alveolata	Dinophyta	Dinophyceae	Dinophyceae_X	Dinophyceae_XX	Gymnodinium	Gymnodinium_aureolum;
AF022201.1.1803_U	DNA	Alveolates-Dinoflagellates	Pentapharsodinium	Eukaryota	Alveolata	Dinophyta	Dinophyceae	Dinophyceae_X	Dinophyceae_XX	Pentapharsodinium	Pentapharsodinium_tyrrhenicum;
AF172712.1.1796_U	DNA	Alveolates-Dinoflagellates	Karlodinium	Eukaryota	Alveolata	Dinophyta	Dinophyceae	Suessiales	Suessiales_X	Karlodinium	Karlodinium_micrum;
AF274265.1.1753_U	DNA	Alveolates-Dinoflagellates	Heterocapsa	Eukaryota	Alveolata	Dinophyta	Dinophyceae	Dinophyceae_X	Dinophyceae_XX	Heterocapsa	Heterocapsa_nei/rotundata;
AJ488687.1.951_U	DNA	Opisthokont-Metazoa	Mollusca	Eukaryota	Opisthokonta	Metazoa	Mollusca	Gastropoda	Caenogastropoda	Cremnoconchus	Cremnoconchus_syhadrensis;
AY425300.1.1772_U	DNA	Archaeplastids-Chlorophytes	Chlorodendrophyceae	Eukaryota	Archaeplastida	Chlorophyta	Chlorodendrophyceae	Chlorodendrales	Chlorodendraceae	Chlorodendrales_XX	Chlorodendrales_XX_sp.;
AY664925.1.1753_U	DNA	Alveolates-Dinoflagellates	Dinophyceae	Eukaryota	Alveolata	Dinophyta	Dinophyceae	Dinophyceae_X	Dinophyceae_XX	Dinophyceae_XXX	Dinophyceae_XXX_sp.;
AY664927.1.1755_U	DNA	Alveolates-Dinoflagellates	Dinophyceae	Eukaryota	Alveolata	Dinophyta	Dinophyceae	Dinophyceae_X	Dinophyceae_XX	Dinophyceae_XXX	Dinophyceae_XXX_sp.;
AY665022.1.1751_U	DNA	Alveolates-Syndiniales	Dino-Group-I	Eukaryota	Alveolata	Dinophyta	Syndiniales	Dino-Group-I	Dino-Group-I-Clade-5	Dino-Group-I-Clade-5_X	Dino-Group-I-Clade-5_X_sp.;
AY665094.1.1755_U	DNA	Rhizaria-Cercozoa	Novel-clade-2	Eukaryota	Rhizaria	Cercozoa	Filosa-Imbricatea	Filosa-Imbricatea_X	Novel-clade-2	Novel-clade-2_X	Novel-clade-2_X_sp.;
AY882490.1.1210_U	DNA	Rhizaria-Polycystines	Spongodiscidae-Coccodiscidae	Eukaryota	Rhizaria	Radiolaria	Polycystinea	Spumellarida	Spongodiscidae-Coccodiscidae	Spongodiscidae-Coccodiscidae_X	Spongodiscidae-Coccodiscidae_X_sp.;
AY919690.1.1709_U	DNA	Alveolates-Dinoflagellates	Dinophyceae	Eukaryota	Alveolata	Dinophyta	Dinophyceae	Dinophyceae_X	Dinophyceae_XX	Dinophyceae_XXX	Dinophyceae_XXX_sp.;
AY919716.1.1731_U	DNA	Alveolates-Dinoflagellates	Pfiesteriaceae	Eukaryota	Alveolata	Dinophyta	Dinophyceae	Dinophyceae_X	Pfiesteriaceae	Pfiesteriaceae_X	Pfiesteriaceae_X_sp.;
DQ279946.1.1789_U	DNA	Opisthokont-Metazoa	Mollusca	Eukaryota	Opisthokonta	Metazoa	Mollusca	Gastropoda	Heterobranchia	Creseis	Creseis_sp.;
DQ386738.1.1537_U	DNA	Alveolates-Dinoflagellates	Heterocapsa	Eukaryota	Alveolata	Dinophyta	Dinophyceae	Dinophyceae_X	Dinophyceae_XX	Heterocapsa	Heterocapsa_pygmea;
DQ386751.1.1531_U	DNA	Alveolates-Syndiniales	Dino-Group-II	Eukaryota	Alveolata	Dinophyta	Syndiniales	Dino-Group-II	Dino-Group-II-Clade-14	Dino-Group-II-Clade-14_X	Dino-Group-II-Clade-14_X_sp.;
DSR2_ses6	DNA	Alveolates-Dinoflagellates	Gymnodinium	Eukaryota	Alveolata	Dinophyta	Dinophyceae	Dinophyceae_X	Dinophyceae_XX	Gymnodinium	Gymnodinium_sp.;
EF172823.1.1438_U	DNA	Opisthokont-Metazoa	Cnidaria	Eukaryota	Opisthokonta	Metazoa	Cnidaria	Cnidaria_X	Hydrozoa	Hydrozoa_X	Hydrozoa_X_sp.;
EF173001.1.1670_U	DNA	Opisthokonts-Other	Choanoflagellida	Eukaryota	Opisthokonta	Choanoflagellida	Choanoflagellida_X	Choanoflagellida_XX	Choanoflagellida_XX_Clade-3	Choanoflagellida_XX_Clade-3_X	Choanoflagellida_XX_Clade-3_X_sp.;
EF196771.1.884_U	DNA	Opisthokonts-Other	Choanoflagellatea	Eukaryota	Opisthokonta	Choanoflagellida	Choanoflagellatea	Choanoflagellatea_X	Choanoflagellatea_X_Group_L	Choanoflagellatea_X_Group_L_X	Choanoflagellatea_X_Group_L_X_sp.;
EF219017.1.1703_U	DNA	Opisthokont-Metazoa	Arthropoda	Eukaryota	Opisthokonta	Metazoa	Arthropoda	Crustacea	Maxillopoda	Maxillopoda_X	Maxillopoda_X_sp.;
EF526787.1.1341_U	DNA	Alveolates-Dinoflagellates	Dinophyceae	Eukaryota	Alveolata	Dinophyta	Dinophyceae	Dinophyceae_X	Dinophyceae_XX	Dinophyceae_XXX	Dinophyceae_XXX_sp.;
EF526829.1.1391_U	DNA	Alveolates-Dinoflagellates	Dinophyceae	Eukaryota	Alveolata	Dinophyta	Dinophyceae	Dinophyceae_X	Dinophyceae_XX	Dinophyceae_XXX	Dinophyceae_XXX_sp.;
EU175214.1.848_UC	DNA	Opisthokont-Fungi	Other-unclassified	Eukaryota	Opisthokonta	Fungi	Ascomycota	Pezizomycotina	Sordariomycetes	Sordariomycetes_X	Sordariomycetes_X_sp.;
EU371327.1.1749_U	DNA	Alveolates-Dinoflagellates	Dinophyceae	Eukaryota	Alveolata	Dinophyta	Dinophyceae	Dinophyceae_X	Dinophyceae_XX	Dinophyceae_XXX	Dinophyceae_XXX_sp.;
EU371372.1.1763_U	DNA	Alveolates-Dinoflagellates	Gyrodinium	Eukaryota	Alveolata	Dinophyta	Dinophyceae	Dinophyceae_X	Dinophyceae_XX	Gyrodinium	Gyrodinium_spirale;
EU418955.1.1588_U	DNA	Alveolates-Dinoflagellates	Cochlodinium	Eukaryota	Alveolata	Dinophyta	Dinophyceae	Dinophyceae_X	Dinophyceae_XX	Cochlodinium	Cochlodinium_polykrikoides;
EU500025.1.821_U	DNA	Alveolates-Dinoflagellates	Dinophyceae	Eukaryota	Alveolata	Dinophyta	Dinophyceae	Dinophyceae_X	Dinophyceae_XX	Dinophyceae_XXX	Dinophyceae_XXX_sp.;
EU500036.1.817_U	DNA	Alveolates-Dinoflagellates	Heterocapsa	Eukaryota	Alveolata	Dinophyta	Dinophyceae	Dinophyceae_X	Dinophyceae_XX	Heterocapsa	Heterocapsa_nei/rotundata;
EU500057.1.832_U	DNA	Alveolates-Syndiniales	Dino-Group-II	Eukaryota	Alveolata	Dinophyta	Syndiniales	Dino-Group-II	Dino-Group-II-Clade-50	Dino-Group-II-Clade-50_X	Dino-Group-II-Clade-50_X_sp.;
EU500153.1.840_U	DNA	Stramenopiles-Other	Rhizochromulinales	Eukaryota	Stramenopiles	Ochrophyta	Dictyochophyceae	Dictyochophyceae_X	Rhizochromulinales	Rhizochromulinales_X	Rhizochromulinales_X_sp.;
EU780597.1.1697_U	DNA	Alveolates-Syndiniales	Dino-Group-II	Eukaryota	Alveolata	Dinophyta	Syndiniales	Dino-Group-II	Dino-Group-II-Clade-7	Dino-Group-II-Clade-7_X	Dino-Group-II-Clade-7_X_sp.;
EU780608.1.1708_U	DNA	Alveolates-Dinoflagellates	Dinophyceae	Eukaryota	Alveolata	Dinophyta	Dinophyceae	Dinophyceae_X	Dinophyceae_XX	Dinophyceae_XXX	Dinophyceae_XXX_sp.;
EU780612.1.1712_U	DNA	Alveolates-Dinoflagellates	Dinophyceae	Eukaryota	Alveolata	Dinophyta	Dinophyceae	Dinophyceae_X	Dinophyceae_XX	Dinophyceae_XXX	Dinophyceae_XXX_sp.;
EU780625.1.1684_U	DNA	Alveolates-Dinoflagellates	Lepidodinium	Eukaryota	Alveolata	Dinophyta	Dinophyceae	Dinophyceae_X	Dinophyceae_XX	Lepidodinium	Lepidodinium_chlorophorum;
EU793359.1.1537_U	DNA	Alveolates-Syndiniales	Dino-Group-I	Eukaryota	Alveolata	Dinophyta	Syndiniales	Dino-Group-I	Dino-Group-I-Clade-5	Dino-Group-I-Clade-5_X	Dino-Group-I-Clade-5_X_sp.;
EU793721.1.1015_U	DNA	Alveolates-Dinoflagellates	Dinophyceae	Eukaryota	Alveolata	Dinophyta	Dinophyceae	Dinophyceae_X	Dinophyceae_XX	Dinophyceae_XXX	Dinophyceae_XXX_sp.;
EU818580.1.1112_U	DNA	Alveolates-Syndiniales	Dino-Group-II	Eukaryota	Alveolata	Dinophyta	Syndiniales	Dino-Group-II	Dino-Group-II-Clade-1	Dino-Group-II-Clade-1_X	Dino-Group-II-Clade-1_X_sp.;
FJ000202.1.1379_U	DNA	Alveolates-Dinoflagellates	Dinophyceae	Eukaryota	Alveolata	Dinophyta	Dinophyceae	Dinophyceae_X	Dinophyceae_XX	Dinophyceae_XXX	Dinophyceae_XXX_sp.;
FJ000249.1.1366_U	DNA	Alveolates-Dinoflagellates	Dinophyceae	Eukaryota	Alveolata	Dinophyta	Dinophyceae	Dinophyceae_X	Dinophyceae_XX	Dinophyceae_XXX	Dinophyceae_XXX_sp.;
FJ032676.1.1651_U	DNA	Alveolates-Dinoflagellates	Gymnodinium	Eukaryota	Alveolata	Dinophyta	Dinophyceae	Dinophyceae_X	Dinophyceae_XX	Gymnodinium	Gymnodinium_sp.;
FJ235531.1.1425_U	DNA	Alveolates-Syndiniales	Dino-Group-I	Eukaryota	Alveolata	Dinophyta	Syndiniales	Dino-Group-I	Dino-Group-I-Clade-1	Dino-Group-I-Clade-1_X	Dino-Group-I-Clade-1_X_sp.;
FJ389787.1.846_U	DNA	Stramenopiles-Other	Thraustochytriaceae	Eukaryota	Stramenopiles	Stramenopiles_X	Labyrinthulea	Thraustochytriales	Thraustochytriaceae	Thraustochytriaceae_X	Thraustochytriaceae_X_sp.;
FJ473380.1.1206_U	DNA	Alveolates-Dinoflagellates	Chytriodinium	Eukaryota	Alveolata	Dinophyta	Dinophyceae	Dinophyceae_X	Dinophyceae_XX	Chytriodinium	Chytriodinium_affine;
FJ537345.1.1756_U	DNA	Archaeplastids-Chlorophytes	Prasino-Clade-9	Eukaryota	Archaeplastida	Chlorophyta	Prasino-Clade-9	Prasino-Clade-9_X	Prasino-Clade-9-B	Prasino-Clade-9-B_X	Prasino-Clade-9-B_X_sp.;
FJ790208.1.1771_U	DNA	Alveolates-Ciliates	Spirotrichea	Eukaryota	Alveolata	Ciliophora	Spirotrichea	Choreotrichida	Strombidinopsidae	Strombidinopsis	Strombidinopsis_acuminata;
FJ914413.1.1522_U	DNA	Alveolates-Dinoflagellates	Suessiales	Eukaryota	Alveolata	Dinophyta	Dinophyceae	Suessiales	Suessiales_X	Suessiales_XX	Suessiales_XX_sp.;
FN598251.1.1140_U	DNA	Rhizaria-Polycystines	Spumellarida-Group-I	Eukaryota	Rhizaria	Radiolaria	Polycystinea	Spumellarida	Spumellarida-Group-I	Spumellarida-Group-I_X	Spumellarida-Group-I_X_sp.;
FN598275.1.1136_U	DNA	Alveolates-Syndiniales	Dino-Group-II	Eukaryota	Alveolata	Dinophyta	Syndiniales	Dino-Group-II	Dino-Group-II-Clade-1	Dino-Group-II-Clade-1_X	Dino-Group-II-Clade-1_X_sp.;
FN690213.1.1686_U	DNA	Alveolates-Dinoflagellates	Dinophyceae	Eukaryota	Alveolata	Dinophyta	Dinophyceae	Dinophyceae_X	Dinophyceae_XX	Dinophyceae_XXX	Dinophyceae_XXX_sp.;
FN690298.1.1699_U	DNA	Alveolates-Dinoflagellates	Dinophyceae	Eukaryota	Alveolata	Dinophyta	Dinophyceae	Dinophyceae_X	Dinophyceae_XX	Dinophyceae_XXX	Dinophyceae_XXX_sp.;
FR865631.2.1774_U	DNA	Alveolates-Dinoflagellates	Peridinium	Eukaryota	Alveolata	Dinophyta	Dinophyceae	Dinophyceae_X	Dinophyceae_XX	Peridinium	Peridinium_inconspicuum;
GU819648.1.1083_U	DNA	Alveolates-Syndiniales	Dino-Group-II	Eukaryota	Alveolata	Dinophyta	Syndiniales	Dino-Group-II	Dino-Group-II-Clade-4	Dino-Group-II-Clade-4_X	Dino-Group-II-Clade-4_X_sp.;
GU819826.1.1069_U	DNA	Alveolates-Dinoflagellates	Dinophyceae	Eukaryota	Alveolata	Dinophyta	Dinophyceae	Dinophyceae_X	Dinophyceae_XX	Dinophyceae_XXX	Dinophyceae_XXX_sp.;
GU820303.1.1195_U	DNA	Alveolates-Syndiniales	Dino-Group-I	Eukaryota	Alveolata	Dinophyta	Syndiniales	Dino-Group-I	Dino-Group-I-Clade-4	Dino-Group-I-Clade-4_X	Dino-Group-I-Clade-4_X_sp.;
GU820667.1.1071_U	DNA	Alveolates-Syndiniales	Dino-Group-I	Eukaryota	Alveolata	Dinophyta	Syndiniales	Dino-Group-I	Dino-Group-I-Clade-4	Dino-Group-I-Clade-4_X	Dino-Group-I-Clade-4_X_sp.;
GU821355.1.1065_U	DNA	Rhizaria-Acantharia	Chaunacanthida	Eukaryota	Rhizaria	Radiolaria	Acantharea	Chaunacanthida	Chaunacanthida_X	Chaunacanthida_XX	Chaunacanthida_XX_sp.;
GU821372.1.1217_U	DNA	Rhizaria-Polycystines	Spumellarida-Group-I	Eukaryota	Rhizaria	Radiolaria	Polycystinea	Spumellarida	Spumellarida-Group-I	Spumellarida-Group-I_X	Spumellarida-Group-I_X_sp.;
GU823091.1.1412_U	DNA	Rhizaria-Polycystines	Pyloniidae-Spongodiscidae	Eukaryota	Rhizaria	Radiolaria	Polycystinea	Spumellarida	Pyloniidae-Spongodiscidae	Pyloniidae-Spongodiscidae_X	Pyloniidae-Spongodiscidae_X_sp.;
GU823211.1.1406_U	DNA	Stramenopiles-MAST	MAST-3	Eukaryota	Stramenopiles	Stramenopiles_X	MAST	MAST-3	MAST-3D	MAST-3D_X	MAST-3D_X_sp.;
GU823216.1.1365_U	DNA	Stramenopiles-MAST	MAST-3	Eukaryota	Stramenopiles	Stramenopiles_X	MAST	MAST-3	MAST-3I	MAST-3I_X	MAST-3I_X_sp.;
GU823438.1.1073_U	DNA	Stramenopiles-Other	MOCH-5	Eukaryota	Stramenopiles	Stramenopiles_X	MOCH	MOCH-5	MOCH-5_X	MOCH-5_XX	MOCH-5_XX_sp.;
GU823874.1.1201_U	DNA	Alveolates-Dinoflagellates	Dinophyceae	Eukaryota	Alveolata	Dinophyta	Dinophyceae	Dinophyceae_X	Dinophyceae_XX	Dinophyceae_XXX	Dinophyceae_XXX_sp.;
GU823894.1.1386_U	DNA	Alveolates-Dinoflagellates	Dinophyceae	Eukaryota	Alveolata	Dinophyta	Dinophyceae	Dinophyceae_X	Dinophyceae_XX	Dinophyceae_XXX	Dinophyceae_XXX_sp.;
GU824368.1.1093_U	DNA	Alveolates-Dinoflagellates	Dinophyceae	Eukaryota	Alveolata	Dinophyta	Dinophyceae	Dinophyceae_X	Dinophyceae_XX	Dinophyceae_XXX	Dinophyceae_XXX_sp.;
GU824815.1.1070_U	DNA	Alveolates-Dinoflagellates	Dinophyceae	Eukaryota	Alveolata	Dinophyta	Dinophyceae	Dinophyceae_X	Dinophyceae_XX	Dinophyceae_XXX	Dinophyceae_XXX_sp.;
GU825315.1.1202_U	DNA	Alveolates-Dinoflagellates	Dinophyceae	Eukaryota	Alveolata	Dinophyta	Dinophyceae	Dinophyceae_X	Dinophyceae_XX	Dinophyceae_XXX	Dinophyceae_XXX_sp.;
GU825317.1.1199_U	DNA	Alveolates-Dinoflagellates	Dinophyceae	Eukaryota	Alveolata	Dinophyta	Dinophyceae	Dinophyceae_X	Dinophyceae_XX	Dinophyceae_XXX	Dinophyceae_XXX_sp.;
GU825328.1.1072_U	DNA	Alveolates-Dinoflagellates	Dinophyceae	Eukaryota	Alveolata	Dinophyta	Dinophyceae	Dinophyceae_X	Dinophyceae_XX	Dinophyceae_XXX	Dinophyceae_XXX_sp.;
GU825341.1.1203_U	DNA	Alveolates-Dinoflagellates	Dinophyceae	Eukaryota	Alveolata	Dinophyta	Dinophyceae	Dinophyceae_X	Dinophyceae_XX	Dinophyceae_XXX	Dinophyceae_XXX_sp.;
GU825523.1.1072_U	DNA	Alveolates-Dinoflagellates	Dinophyceae	Eukaryota	Alveolata	Dinophyta	Dinophyceae	Dinophyceae_X	Dinophyceae_XX	Dinophyceae_XXX	Dinophyceae_XXX_sp.;
GU825539.1.1073_U	DNA	Alveolates-Dinoflagellates	Dinophyceae	Eukaryota	Alveolata	Dinophyta	Dinophyceae	Dinophyceae_X	Dinophyceae_XX	Dinophyceae_XXX	Dinophyceae_XXX_sp.;
GU825710.1.1199_U	DNA	Alveolates-Dinoflagellates	Dinophyceae	Eukaryota	Alveolata	Dinophyta	Dinophyceae	Dinophyceae_X	Dinophyceae_XX	Dinophyceae_XXX	Dinophyceae_XXX_sp.;
HE860253.1.1759_U	DNA	Archaeplastids-Chlorophytes	Chlorophyta	Eukaryota	Archaeplastida	Chlorophyta	Chlorophyta_X	Chlorophyta_XX	Chlorophyta_XXX	Scotinosphaera	Scotinosphaera_austriaca;
HM581705.1.1793_U	DNA	Alveolates-Dinoflagellates	Dinophyceae	Eukaryota	Alveolata	Dinophyta	Dinophyceae	Dinophyceae_X	Dinophyceae_XX	Dinophyceae_XXX	Dinophyceae_XXX_sp.;
HM581788.1.1759_U	DNA	Alveolates-Ciliates	Spirotrichea	Eukaryota	Alveolata	Ciliophora	Spirotrichea	Strombidiida	Tontoniidae_B	Pseudotontonia	Pseudotontonia_sp.;
HM853809.1.1219_U	DNA	Alveolates-Dinoflagellates	Dinophysis	Eukaryota	Alveolata	Dinophyta	Dinophyceae	Dinophysiales	Dinophysaceae_Oxyphysaceae	Dinophysis	Dinophysis_pusilla;
HQ435813.1.1768_U	DNA	Opisthokont-Metazoa	Ctenophora	Eukaryota	Opisthokonta	Metazoa	Ctenophora	Ctenophora_X	Ctenophora_XX	Coeloplana	Coeloplana_bocki;
HQ446967.1.1794_U	DNA	Alveolates-Syndiniales	Dino-Group-II	Eukaryota	Alveolata	Dinophyta	Syndiniales	Dino-Group-II	Dino-Group-II_X	Dino-Group-II_XX	Dino-Group-II_XX_sp.;
HQ864978.1.885_U	DNA	Alveolates-Syndiniales	Dino-Group-I	Eukaryota	Alveolata	Dinophyta	Syndiniales	Dino-Group-I	Dino-Group-I-Clade-1	Dino-Group-I-Clade-1_X	Dino-Group-I-Clade-1_X_sp.;
HQ865128.1.870_U	DNA	Alveolates-Dinoflagellates	Dinophyceae	Eukaryota	Alveolata	Dinophyta	Dinophyceae	Dinophyceae_X	Dinophyceae_XX	Dinophyceae_XXX	Dinophyceae_XXX_sp.;
HQ865545.1.888_U	DNA	Alveolates-Dinoflagellates	Dinophyceae	Eukaryota	Alveolata	Dinophyta	Dinophyceae	Dinophyceae_X	Dinophyceae_XX	Dinophyceae_XXX	Dinophyceae_XXX_sp.;
HQ867238.1.880_U	DNA	Alveolates-Syndiniales	Dino-Group-II	Eukaryota	Alveolata	Dinophyta	Syndiniales	Dino-Group-II	Dino-Group-II-Clade-16	Dino-Group-II-Clade-16_X	Dino-Group-II-Clade-16_X_sp.;
HQ867329.1.870_U	DNA	Alveolates-Syndiniales	Dino-Group-II	Eukaryota	Alveolata	Dinophyta	Syndiniales	Dino-Group-II	Dino-Group-II-Clade-1	Dino-Group-II-Clade-1_X	Dino-Group-II-Clade-1_X_sp.;
HQ867351.1.869_U	DNA	Alveolates-Dinoflagellates	Dinophyceae	Eukaryota	Alveolata	Dinophyta	Dinophyceae	Dinophyceae_X	Dinophyceae_XX	Dinophyceae_XXX	Dinophyceae_XXX_sp.;
HQ867353.1.875_U	DNA	Opisthokont-Metazoa	Arthropoda	Eukaryota	Opisthokonta	Metazoa	Arthropoda	Crustacea	Maxillopoda	Maxillopoda_X	Maxillopoda_X_sp.;
HQ867405.1.887_U	DNA	Opisthokont-Metazoa	Arthropoda	Eukaryota	Opisthokonta	Metazoa	Arthropoda	Crustacea	Maxillopoda	Maxillopoda_X	Maxillopoda_X_sp.;
HQ870316.1.852_U	DNA	Opisthokont-Metazoa	Urochordata	Eukaryota	Opisthokonta	Metazoa	Urochordata	Urochordata_X	Appendicularia	Appendicularia_X	Appendicularia_X_sp.;
JF719081.1.1357_U	DNA	Opisthokont-Fungi	Other-unclassified	Eukaryota	Opisthokonta	Fungi	Ascomycota	Pezizomycotina	Dothideomycetes	Dothideomycetes_X	Dothideomycetes_X_sp.;
JF906998.1.1803_U	DNA	Alveolates-Dinoflagellates	Alexandrium	Eukaryota	Alveolata	Dinophyta	Dinophyceae	Dinophyceae_X	Dinophyceae_XX	Alexandrium	Alexandrium_minutum;
JN090875.1.1798_U	DNA	Alveolates-Dinoflagellates	Pfiesteriaceae	Eukaryota	Alveolata	Dinophyta	Dinophyceae	Dinophyceae_X	Pfiesteriaceae	Pfiesteriaceae_X	Pfiesteriaceae_X_sp.;
JN811185.1.1695_U	DNA	Rhizaria-Acantharia	Lychnaspis	Eukaryota	Rhizaria	Radiolaria	Acantharea	Arthracanthida-Symphyacanthida	Arthracanthida-Symphyacanthida_X	Lychnaspis	Lychnaspis_giltschi;
JQ956282.1.1706_U	DNA	Alveolates-Dinoflagellates	Dinophyceae	Eukaryota	Alveolata	Dinophyta	Dinophyceae	Dinophyceae_X	Dinophyceae_XX	Dinophyceae_XXX	Dinophyceae_XXX_sp.;
JX029106.1.1024_U	DNA	Opisthokont-Fungi	Other-unclassified	Eukaryota	Opisthokonta	Fungi	Ascomycota	Pezizomycotina	Leotiomycetes	Helotiales	Helotiales_sp.;
JX188316.1.1773_U	DNA	Rhizaria-RAD (A,B,C)	RAD-A	Eukaryota	Rhizaria	Radiolaria	RAD-A	RAD-A_X	RAD-A_XX	RAD-A_XXX	RAD-A_XXX_sp.;
JX840893.1.1050_U	DNA	Alveolates-Dinoflagellates	Dinophyceae	Eukaryota	Alveolata	Dinophyta	Dinophyceae	Dinophyceae_X	Dinophyceae_XX	Dinophyceae_XXX	Dinophyceae_XXX_sp.;
JX840901.1.850_U	DNA	Alveolates-Syndiniales	Dino-Group-II	Eukaryota	Alveolata	Dinophyta	Syndiniales	Dino-Group-II	Dino-Group-II-Clade-21	Dino-Group-II-Clade-21_X	Dino-Group-II-Clade-21_X_sp.;
JX840904.1.1235_U	DNA	Alveolates-Dinoflagellates	Gyrodinium	Eukaryota	Alveolata	Dinophyta	Dinophyceae	Dinophyceae_X	Dinophyceae_XX	Gyrodinium	Gyrodinium_spirale;
KC488426.1.1709_U	DNA	Alveolates-Dinoflagellates	Gyrodinium	Eukaryota	Alveolata	Dinophyta	Dinophyceae	Dinophyceae_X	Dinophyceae_XX	Gyrodinium	Gyrodinium_sp.;
KC582905.1.1790_U	DNA	Alveolates-Syndiniales	Dino-Group-II	Eukaryota	Alveolata	Dinophyta	Syndiniales	Dino-Group-II	Dino-Group-II-Clade-22	Dino-Group-II-Clade-22_X	Dino-Group-II-Clade-22_X_sp.;
KC582915.1.1798_U	DNA	Alveolates-Dinoflagellates	Dinophyceae	Eukaryota	Alveolata	Dinophyta	Dinophyceae	Dinophyceae_X	Dinophyceae_XX	Dinophyceae_XXX	Dinophyceae_XXX_sp.;
KC582969.1.1808_U	DNA	Opisthokonts-Other	Opisthokonta	Eukaryota	Opisthokonta	Opisthokonta_X	Opisthokonta_XX	Opisthokonta_XXX	Opisthokonta_XXXX	Opisthokonta_XXXXX	Opisthokonta_XXXXX_sp.;
KC583038.1.1788_U	DNA	Rhizaria-RAD (A,B,C)	RAD-A	Eukaryota	Rhizaria	Radiolaria	RAD-A	RAD-A_X	RAD-A_XX	RAD-A_XXX	RAD-A_XXX_sp.;
KF031575.1.1756_U	DNA	Alveolates-Syndiniales	Dino-Group-I	Eukaryota	Alveolata	Dinophyta	Syndiniales	Dino-Group-I	Dino-Group-I-Clade-1	Dino-Group-I-Clade-1_X	Dino-Group-I-Clade-1_X_sp.;
KF031746.1.1755_U	DNA	Alveolates-Syndiniales	Dino-Group-I	Eukaryota	Alveolata	Dinophyta	Syndiniales	Dino-Group-I	Dino-Group-I-Clade-1	Dino-Group-I-Clade-1_X	Dino-Group-I-Clade-1_X_sp.;
KF031828.1.1755_U	DNA	Alveolates-Syndiniales	Dino-Group-I	Eukaryota	Alveolata	Dinophyta	Syndiniales	Dino-Group-I	Dino-Group-I-Clade-1	Dino-Group-I-Clade-1_X	Dino-Group-I-Clade-1_X_sp.;
KF031875.1.1776_U	DNA	Opisthokont-Metazoa	Urochordata	Eukaryota	Opisthokonta	Metazoa	Urochordata	Urochordata_X	Appendicularia	Oikopleura	Oikopleura_dioica;
KF031906.1.1773_U	DNA	Opisthokont-Metazoa	Urochordata	Eukaryota	Opisthokonta	Metazoa	Urochordata	Urochordata_X	Appendicularia	Appendicularia_X	Appendicularia_X_sp.;
KF129703.1.1753_U	DNA	Other/unknown	Telonemia	Eukaryota	Hacrobia	Telonemia	Telonemia_X	Telonemia_XX	Telonemia-Group-2	Telonemia-Group-2_X	Telonemia-Group-2_X_sp.;
KF129723.1.1735_U	DNA	Alveolates-Ciliates	Spirotrichea	Eukaryota	Alveolata	Ciliophora	Spirotrichea	Strombidiida_D	Strombidiida_D_X	Strombidiida_D_XX	Strombidiida_D_XX_sp.;
KF129830.1.1759_U	DNA	Alveolates-Syndiniales	Dino-Group-II	Eukaryota	Alveolata	Dinophyta	Syndiniales	Dino-Group-II	Dino-Group-II_X	Dino-Group-II_XX	Dino-Group-II_XX_sp.;
KF129831.1.1758_U	DNA	Alveolates-Dinoflagellates	Dinophyceae	Eukaryota	Alveolata	Dinophyta	Dinophyceae	Dinophyceae_X	Dinophyceae_XX	Dinophyceae_XXX	Dinophyceae_XXX_sp.;
KF130222.1.1745_U	DNA	Alveolates-Syndiniales	Dino-Group-I	Eukaryota	Alveolata	Dinophyta	Syndiniales	Dino-Group-I	Dino-Group-I-Clade-5	Dino-Group-I-Clade-5_X	Dino-Group-I-Clade-5_X_sp.;
KF130236.1.1764_U	DNA	Alveolates-Dinoflagellates	Dinophyceae	Eukaryota	Alveolata	Dinophyta	Dinophyceae	Dinophyceae_X	Dinophyceae_XX	Dinophyceae_XXX	Dinophyceae_XXX_sp.;
KF130288	DNA	Haptophytes	Haptophyta_Clade_HAP4	Eukaryota	Hacrobia	Haptophyta	Haptophyta_Clade_HAP4	Haptophyta_Clade_HAP4_X	Haptophyta_Clade_HAP4_XX	Haptophyta_Clade_HAP4_XXX	Haptophyta_Clade_HAP4_XXX_sp.;
KF422620	DNA	Haptophytes	Helicosphaeraceae	Eukaryota	Hacrobia	Haptophyta	Prymnesiophyceae	Zygodiscales	Helicosphaeraceae	Helicosphaera	Helicosphaera_carteri;
KJ757211.1.1741_U	DNA	Alveolates-Ciliates	Spirotrichea	Eukaryota	Alveolata	Ciliophora	Spirotrichea	Choreotrichida	Leegaardiellidae_B	Leegaardiella	Leegaardiella_sp.;
KJ757275.1.1796_U	DNA	Alveolates-Dinoflagellates	Gyrodinium	Eukaryota	Alveolata	Dinophyta	Dinophyceae	Dinophyceae_X	Dinophyceae_XX	Gyrodinium	Gyrodinium_sp.;
KJ757402.1.1804_U	DNA	Alveolates-Dinoflagellates	Dinophyceae	Eukaryota	Alveolata	Dinophyta	Dinophyceae	Dinophyceae_X	Dinophyceae_XX	Dinophyceae_XXX	Dinophyceae_XXX_sp.;
KJ757846.1.1801_U	DNA	Alveolates-Dinoflagellates	Dinophyceae	Eukaryota	Alveolata	Dinophyta	Dinophyceae	Dinophyceae_X	Dinophyceae_XX	Dinophyceae_XXX	Dinophyceae_XXX_sp.;
KJ757870.1.1795_U	DNA	Alveolates-Dinoflagellates	Dinophyceae	Eukaryota	Alveolata	Dinophyta	Dinophyceae	Dinophyceae_X	Dinophyceae_XX	Dinophyceae_XXX	Dinophyceae_XXX_sp.;
KJ757901.1.1789_U	DNA	Alveolates-Dinoflagellates	Gyrodinium	Eukaryota	Alveolata	Dinophyta	Dinophyceae	Dinophyceae_X	Dinophyceae_XX	Gyrodinium	Gyrodinium_sp.;
KJ757936.1.1803_U	DNA	Alveolates-Dinoflagellates	Dinophyceae	Eukaryota	Alveolata	Dinophyta	Dinophyceae	Dinophyceae_X	Dinophyceae_XX	Dinophyceae_XXX	Dinophyceae_XXX_sp.;
KJ757997.1.1801_U	DNA	Alveolates-Dinoflagellates	Dinophyceae	Eukaryota	Alveolata	Dinophyta	Dinophyceae	Dinophyceae_X	Dinophyceae_XX	Dinophyceae_XXX	Dinophyceae_XXX_sp.;
KJ758184.1.1788_U	DNA	Alveolates-Dinoflagellates	Gyrodinium	Eukaryota	Alveolata	Dinophyta	Dinophyceae	Dinophyceae_X	Dinophyceae_XX	Gyrodinium	Gyrodinium_sp.;
KJ758904.1.1796_U	DNA	Alveolates-Syndiniales	Dino-Group-II	Eukaryota	Alveolata	Dinophyta	Syndiniales	Dino-Group-II	Dino-Group-II_X	Dino-Group-II_XX	Dino-Group-II_XX_sp.;
KJ759286.1.1796_U	DNA	Alveolates-Dinoflagellates	Dinophyceae	Eukaryota	Alveolata	Dinophyta	Dinophyceae	Dinophyceae_X	Dinophyceae_XX	Dinophyceae_XXX	Dinophyceae_XXX_sp.;
KJ759299.1.1801_U	DNA	Alveolates-Dinoflagellates	Karlodinium	Eukaryota	Alveolata	Dinophyta	Dinophyceae	Suessiales	Suessiales_X	Karlodinium	Karlodinium_sp.;
KJ759337.1.1800_U	DNA	Alveolates-Syndiniales	Dino-Group-III	Eukaryota	Alveolata	Dinophyta	Syndiniales	Dino-Group-III	Dino-Group-III_X	Dino-Group-III_XX	Dino-Group-III_XX_sp.;
KJ759387.1.1799_U	DNA	Alveolates-Syndiniales	Dino-Group-III	Eukaryota	Alveolata	Dinophyta	Syndiniales	Dino-Group-III	Dino-Group-III_X	Dino-Group-III_XX	Dino-Group-III_XX_sp.;
KJ759412.1.1803_U	DNA	Opisthokont-Metazoa	Arthropoda	Eukaryota	Opisthokonta	Metazoa	Arthropoda	Crustacea	Maxillopoda	Maxillopoda_X	Maxillopoda_X_sp.;
KJ759474.1.1797_U	DNA	Alveolates-Dinoflagellates	Prorocentrum	Eukaryota	Alveolata	Dinophyta	Dinophyceae	Dinophyceae_X	Dinophyceae_XX	Prorocentrum	Prorocentrum_sp.;
KJ759483.1.1783_U	DNA	Alveolates-Syndiniales	Dino-Group-I	Eukaryota	Alveolata	Dinophyta	Syndiniales	Dino-Group-I	Dino-Group-I-Clade-1	Dino-Group-I-Clade-1_X	Dino-Group-I-Clade-1_X_sp.;
KJ759495.1.1796_U	DNA	Alveolates-Syndiniales	Dino-Group-II	Eukaryota	Alveolata	Dinophyta	Syndiniales	Dino-Group-II	Dino-Group-II-Clade-1	Dino-Group-II-Clade-1_X	Dino-Group-II-Clade-1_X_sp.;
KJ759532.1.1802_U	DNA	Opisthokont-Metazoa	Arthropoda	Eukaryota	Opisthokonta	Metazoa	Arthropoda	Crustacea	Maxillopoda	Maxillopoda_X	Maxillopoda_X_sp.;
KJ759634.1.1797_U	DNA	Alveolates-Dinoflagellates	Dinophyceae	Eukaryota	Alveolata	Dinophyta	Dinophyceae	Dinophyceae_X	Dinophyceae_XX	Dinophyceae_XXX	Dinophyceae_XXX_sp.;
KJ759667.1.1800_U	DNA	Alveolates-Dinoflagellates	Dinophyceae	Eukaryota	Alveolata	Dinophyta	Dinophyceae	Dinophyceae_X	Dinophyceae_XX	Dinophyceae_XXX	Dinophyceae_XXX_sp.;
KJ760088.1.1741_U	DNA	Alveolates-Ciliates	Spirotrichea	Eukaryota	Alveolata	Ciliophora	Spirotrichea	Choreotrichida	Leegaardiellidae_B	Leegaardiella	Leegaardiella_sp.;
KJ760404.1.1796_U	DNA	Alveolates-Syndiniales	Dino-Group-II	Eukaryota	Alveolata	Dinophyta	Syndiniales	Dino-Group-II	Dino-Group-II-Clade-17	Dino-Group-II-Clade-17_X	Dino-Group-II-Clade-17_X_sp.;
KJ760721.1.1797_U	DNA	Stramenopiles-Diatoms	Actinocyclus	Eukaryota	Stramenopiles	Ochrophyta	Bacillariophyta	Bacillariophyta_X	Radial-centric-basal-Coscinodiscophyceae	Actinocyclus	Actinocyclus_sp.;
KJ760797.1.1791_U	DNA	Alveolates-Syndiniales	Dino-Group-I	Eukaryota	Alveolata	Dinophyta	Syndiniales	Dino-Group-I	Dino-Group-I-Clade-1	Dino-Group-I-Clade-1_X	Dino-Group-I-Clade-1_X_sp.;
KJ762561.1.1798_U	DNA	Alveolates-Syndiniales	Dino-Group-II	Eukaryota	Alveolata	Dinophyta	Syndiniales	Dino-Group-II	Dino-Group-II-Clade-1	Dino-Group-II-Clade-1_X	Dino-Group-II-Clade-1_X_sp.;
KJ762863.1.1802_U	DNA	Alveolates-Dinoflagellates	Dinophyceae	Eukaryota	Alveolata	Dinophyta	Dinophyceae	Dinophyceae_X	Dinophyceae_XX	Dinophyceae_XXX	Dinophyceae_XXX_sp.;
KJ762965.1.1798_U	DNA	Alveolates-Dinoflagellates	Dinophyceae	Eukaryota	Alveolata	Dinophyta	Dinophyceae	Dinophyceae_X	Dinophyceae_XX	Dinophyceae_XXX	Dinophyceae_XXX_sp.;
KJ763014.1.1803_U	DNA	Alveolates-Dinoflagellates	Dinophyceae	Eukaryota	Alveolata	Dinophyta	Dinophyceae	Dinophyceae_X	Dinophyceae_XX	Dinophyceae_XXX	Dinophyceae_XXX_sp.;
KJ763131.1.1800_U	DNA	Alveolates-Dinoflagellates	DinophytaX	Eukaryota	Alveolata	Dinophyta	Dinophyta_X	Dinophyta_XX	Dinophyta_XXX	Dinophyta_XXXX	Dinophyta_XXXX_sp.;
KJ763495.1.1796_U	DNA	Alveolates-Syndiniales	Dino-Group-II	Eukaryota	Alveolata	Dinophyta	Syndiniales	Dino-Group-II	Dino-Group-II-Clade-1	Dino-Group-II-Clade-1_X	Dino-Group-II-Clade-1_X_sp.;
KJ763910.1.1797_U	DNA	Alveolates-Syndiniales	Dino-Group-II	Eukaryota	Alveolata	Dinophyta	Syndiniales	Dino-Group-II	Dino-Group-II-Clade-25	Dino-Group-II-Clade-25_X	Dino-Group-II-Clade-25_X_sp.;
KJ764068.1.1807_U	DNA	Alveolates-Dinoflagellates	Dinophyceae	Eukaryota	Alveolata	Dinophyta	Dinophyceae	Dinophyceae_X	Dinophyceae_XX	Dinophyceae_XXX	Dinophyceae_XXX_sp.;
KJ764308.1.1786_U	DNA	Alveolates-Dinoflagellates	Dinophyceae	Eukaryota	Alveolata	Dinophyta	Dinophyceae	Dinophyceae_X	Dinophyceae_XX	Dinophyceae_XXX	Dinophyceae_XXX_sp.;
New.ReferenceOTU145	DNA	Unassigned	Other-unclassified	None	XXX	XXX	XXX	XXX	XXX	XXX	XXX
New.ReferenceOTU173	DNA	Unassigned	Other-unclassified	None	XXX	XXX	XXX	XXX	XXX	XXX	XXX
New.ReferenceOTU19	DNA	Unassigned	Other-unclassified	None	XXX	XXX	XXX	XXX	XXX	XXX	XXX
New.ReferenceOTU198	DNA	Unassigned	Other-unclassified	None	XXX	XXX	XXX	XXX	XXX	XXX	XXX
New.ReferenceOTU201	DNA	Unassigned	Other-unclassified	None	XXX	XXX	XXX	XXX	XXX	XXX	XXX
New.ReferenceOTU202	DNA	Unassigned	Other-unclassified	None	XXX	XXX	XXX	XXX	XXX	XXX	XXX
New.ReferenceOTU222	DNA	Unassigned	Other-unclassified	None	XXX	XXX	XXX	XXX	XXX	XXX	XXX
New.ReferenceOTU238	DNA	Unassigned	Other-unclassified	None	XXX	XXX	XXX	XXX	XXX	XXX	XXX
New.ReferenceOTU243	DNA	Unassigned	Other-unclassified	None	XXX	XXX	XXX	XXX	XXX	XXX	XXX
New.ReferenceOTU245	DNA	Unassigned	Other-unclassified	None	XXX	XXX	XXX	XXX	XXX	XXX	XXX
New.ReferenceOTU248	DNA	Unassigned	Other-unclassified	None	XXX	XXX	XXX	XXX	XXX	XXX	XXX
New.ReferenceOTU252	DNA	Unassigned	Other-unclassified	None	XXX	XXX	XXX	XXX	XXX	XXX	XXX
New.ReferenceOTU279	DNA	Unassigned	Other-unclassified	None	XXX	XXX	XXX	XXX	XXX	XXX	XXX
New.ReferenceOTU296	DNA	Unassigned	Other-unclassified	None	XXX	XXX	XXX	XXX	XXX	XXX	XXX
New.ReferenceOTU299	DNA	Unassigned	Other-unclassified	None	XXX	XXX	XXX	XXX	XXX	XXX	XXX
New.ReferenceOTU30	DNA	Unassigned	Other-unclassified	None	XXX	XXX	XXX	XXX	XXX	XXX	XXX
New.ReferenceOTU363	DNA	Unassigned	Other-unclassified	None	XXX	XXX	XXX	XXX	XXX	XXX	XXX
New.ReferenceOTU365	DNA	Unassigned	Other-unclassified	None	XXX	XXX	XXX	XXX	XXX	XXX	XXX
New.ReferenceOTU370	DNA	Unassigned	Other-unclassified	None	XXX	XXX	XXX	XXX	XXX	XXX	XXX
New.ReferenceOTU388	DNA	Unassigned	Other-unclassified	None	XXX	XXX	XXX	XXX	XXX	XXX	XXX
New.ReferenceOTU4	DNA	Unassigned	Other-unclassified	None	XXX	XXX	XXX	XXX	XXX	XXX	XXX
New.ReferenceOTU410	DNA	Unassigned	Other-unclassified	None	XXX	XXX	XXX	XXX	XXX	XXX	XXX
New.ReferenceOTU66	DNA	Unassigned	Other-unclassified	None	XXX	XXX	XXX	XXX	XXX	XXX	XXX
New.ReferenceOTU67	DNA	Unassigned	Other-unclassified	None	XXX	XXX	XXX	XXX	XXX	XXX	XXX
New.ReferenceOTU68	DNA	Unassigned	Other-unclassified	None	XXX	XXX	XXX	XXX	XXX	XXX	XXX
New.ReferenceOTU93	DNA	Unassigned	Other-unclassified	None	XXX	XXX	XXX	XXX	XXX	XXX	XXX
AB016539.1.1726_U	RNA	Alveolates-Dinoflagellates	Symbiodinium	Eukaryota	Alveolata	Dinophyta	Dinophyceae	Suessiales	Suessiales_X	Symbiodinium	Symbiodinium_sp.;
AB058365.1.1726_U	RNA	Cryptophytes	Other-unclassified	Eukaryota	Hacrobia	Cryptophyta	Cryptophyceae	Cryptophyceae_X	Cryptomonadales	Geminigera	Geminigera_cryophila;
AB120001.1.1725_U	RNA	Alveolates-Dinoflagellates	Gyrodinium	Eukaryota	Alveolata	Dinophyta	Dinophyceae	Dinophyceae_X	Dinophyceae_XX	Gyrodinium	Gyrodinium_spirale;
AB178588.1.1777_U	RNA	Rhizaria-Acantharia	Hexaconus	Eukaryota	Rhizaria	Radiolaria	Acantharea	Arthracanthida-Symphyacanthida	Arthracanthida-Symphyacanthida_X	Hexaconus	Hexaconus_serratus;
AB193605.1.1723_U	RNA	Rhizaria-Polycystines	Didymocyrtis	Eukaryota	Rhizaria	Radiolaria	Polycystinea	Spumellarida	Spongodiscidae-Coccodiscidae	Didymocyrtis	Didymocyrtis_tetrathalamus;
AB275041.1.1657_U	RNA	Stramenopiles-MAST	MAST-9	Eukaryota	Stramenopiles	Stramenopiles_X	MAST	MAST-9	MAST-9C	MAST-9C_X	MAST-9C_X_sp.;
AB284159.1.1765_U	RNA	Alveolates-Dinoflagellates	Protoperidinium	Eukaryota	Alveolata	Dinophyta	Dinophyceae	Dinophyceae_X	Dinophyceae_XX	Protoperidinium	Protoperidinium_bipes;
AB330055.1.1510_U	RNA	Alveolates-Ciliates	Phyllopharyngea	Eukaryota	Alveolata	Ciliophora	Phyllopharyngea	Cyrtophoria	Chlamydodontidae	Chlamydodontidae_X	Chlamydodontidae_X_sp.;
AB847970	RNA	Haptophytes	Braarudosphaeraceae	Eukaryota	Hacrobia	Haptophyta	Prymnesiophyceae	Prymnesiophyceae_X	Braarudosphaeraceae	Braarudosphaera	Braarudosphaera_bigelowii;
AF363190.1.1805_U	RNA	Stramenopiles-MAST	MAST-1	Eukaryota	Stramenopiles	Stramenopiles_X	MAST	MAST-1	MAST-1A	MAST-1A_X	MAST-1A_X_sp.;
AF374480.1.1805_U	RNA	Stramenopiles-Diatoms	Thalassiosira	Eukaryota	Stramenopiles	Ochrophyta	Bacillariophyta	Bacillariophyta_X	Polar-centric-Mediophyceae	Thalassiosira	Thalassiosira_rotula;
AF399144.1.1710_U	RNA	Alveolates-Ciliates	Spirotrichea	Eukaryota	Alveolata	Ciliophora	Spirotrichea	Tintinnida	Rhabdonellidae	Metacylis	Metacylis_angulata;
AF438326.1.1774_U	RNA	Stramenopiles-Other	Pinguiochrysis	Eukaryota	Stramenopiles	Ochrophyta	Pinguiophyceae	Pinguiochrysidales	Pinguiochrysidaceae	Pinguiochrysis	Pinguiochrysis_pyriformis;
AJ402349.1.1758_U	RNA	Alveolates-Syndiniales	Dino-Group-III	Eukaryota	Alveolata	Dinophyta	Syndiniales	Dino-Group-III	Dino-Group-III_X	Dino-Group-III_XX	Dino-Group-III_XX_sp.;
AJ402350.1.1758_U	RNA	Stramenopiles-MAST	MAST-1	Eukaryota	Stramenopiles	Stramenopiles_X	MAST	MAST-1	MAST-1D	MAST-1D_X	MAST-1D_X_sp.;
AJ402357.1.1758_U	RNA	Stramenopiles-MAST	MAST-3	Eukaryota	Stramenopiles	Stramenopiles_X	MAST	MAST-3	MAST-3A	MAST-3A_X	MAST-3A_X_sp.;
AJ544115	RNA	Haptophytes	Calcidiscaceae	Eukaryota	Hacrobia	Haptophyta	Prymnesiophyceae	Coccolithales	Calcidiscaceae	Calcidiscus	Calcidiscus_quadriperforatus;
AM418562.1.1795_U	RNA	Other/unknown	Telonemia	Eukaryota	Hacrobia	Telonemia	Telonemia_X	Telonemia_XX	Telonemia-Group-2	Telonemia-Group-2_X	Telonemia-Group-2_X_sp.;
AM491007	RNA	Haptophytes	Prymnesiaceae	Eukaryota	Hacrobia	Haptophyta	Prymnesiophyceae	Prymnesiales	Prymnesiaceae	Prymnesium	Prymnesium_annuliferum;
AM491012	RNA	Haptophytes	Prymnesiaceae	Eukaryota	Hacrobia	Haptophyta	Prymnesiophyceae	Prymnesiales	Prymnesiaceae	Haptolina	Haptolina_brevifila;
AM491021	RNA	Haptophytes	Chrysochromulinaceae	Eukaryota	Hacrobia	Haptophyta	Prymnesiophyceae	Prymnesiales	Chrysochromulinaceae	Chrysochromulina	Chrysochromulina_simplex;
AY129041.1.1797_U	RNA	Alveolates-Syndiniales	Dino-Group-II	Eukaryota	Alveolata	Dinophyta	Syndiniales	Dino-Group-II	Dino-Group-II-Clade-10-and-11	Dino-Group-II-Clade-10-and-11_X	Dino-Group-II-Clade-10-and-11_X_sp.;
AY256270.1.1308_U	RNA	Stramenopiles-Diatoms	Araphid-pennate	Eukaryota	Stramenopiles	Ochrophyta	Bacillariophyta	Bacillariophyta_X	Araphid-pennate	Araphid-pennate_X	Araphid-pennate_X_sp.;
AY256275.1.1229_U	RNA	Rhizaria-RAD (A,B,C)	RAD-A	Eukaryota	Rhizaria	Radiolaria	RAD-A	RAD-A_X	RAD-A_XX	RAD-A_XXX	RAD-A_XXX_sp.;
AY295415.1.1722_U	RNA	Stramenopiles-MAST	MAST-3	Eukaryota	Stramenopiles	Stramenopiles_X	MAST	MAST-3	MAST-3L	MAST-3L_X	MAST-3L_X_sp.;
AY425300.1.1772_U	RNA	Archaeplastids-Chlorophytes	Chlorodendrophyceae	Eukaryota	Archaeplastida	Chlorophyta	Chlorodendrophyceae	Chlorodendrales	Chlorodendraceae	Chlorodendrales_XX	Chlorodendrales_XX_sp.;
AY426845.1.1789_U	RNA	Opisthokonts-Other	Choanoflagellatea	Eukaryota	Opisthokonta	Choanoflagellida	Choanoflagellatea	Acanthoecida	Stephanoecidae_Group_E	Stephanoecidae_Group_E_X	Stephanoecidae_Group_E_X_sp.;
AY426848.1.1787_U	RNA	Opisthokonts-Other	Choanoflagellatea	Eukaryota	Opisthokonta	Choanoflagellida	Choanoflagellatea	Acanthoecida	Stephanoecidae_Group_D	Stephanoecidae_Group_D_X	Stephanoecidae_Group_D_X_sp.;
AY443022.1.1751_U	RNA	Alveolates-Dinoflagellates	Protoperidinium	Eukaryota	Alveolata	Dinophyta	Dinophyceae	Dinophyceae_X	Dinophyceae_XX	Protoperidinium	Protoperidinium_pellucidum;
AY551272.1.1787_U	RNA	Alveolates-Dinoflagellates	Prorocentrum	Eukaryota	Alveolata	Dinophyta	Dinophyceae	Dinophyceae_X	Dinophyceae_XX	Prorocentrum	Prorocentrum_donghaiense;
AY664894.1.1756_U	RNA	Alveolates-Dinoflagellates	Dinophyceae	Eukaryota	Alveolata	Dinophyta	Dinophyceae	Dinophyceae_X	Dinophyceae_XX	Dinophyceae_XXX	Dinophyceae_XXX_sp.;
AY664925.1.1753_U	RNA	Alveolates-Dinoflagellates	Dinophyceae	Eukaryota	Alveolata	Dinophyta	Dinophyceae	Dinophyceae_X	Dinophyceae_XX	Dinophyceae_XXX	Dinophyceae_XXX_sp.;
AY664955.1.1752_U	RNA	Alveolates-Dinoflagellates	Dinophyceae	Eukaryota	Alveolata	Dinophyta	Dinophyceae	Dinophyceae_X	Dinophyceae_XX	Dinophyceae_XXX	Dinophyceae_XXX_sp.;
AY664975.1.1755_U	RNA	Alveolates-Dinoflagellates	Dinophyceae	Eukaryota	Alveolata	Dinophyta	Dinophyceae	Dinophyceae_X	Dinophyceae_XX	Dinophyceae_XXX	Dinophyceae_XXX_sp.;
AY665053.1.1754_U	RNA	Alveolates-Dinoflagellates	Dinophyceae	Eukaryota	Alveolata	Dinophyta	Dinophyceae	Dinophyceae_X	Dinophyceae_XX	Dinophyceae_XXX	Dinophyceae_XXX_sp.;
DQ120009.1.1729_U	RNA	Alveolates-Ciliates	Litostomatea	Eukaryota	Alveolata	Ciliophora	Litostomatea	Cyclotrichia	Cyclotrichia_X	Cyclotrichia_XX	Cyclotrichia_XX_sp.;
DQ222875.1.1801_U	RNA	Other/unknown	Picozoa	Eukaryota	Hacrobia	Picozoa	Picozoa_X	Picozoa_XX	Picozoa_XXX	Picozoa_XXXX	Picozoa_XXXX_sp.;
DQ837534.1.1782_U	RNA	Alveolates-Dinoflagellates	Gymnodinium	Eukaryota	Alveolata	Dinophyta	Dinophyceae	Dinophyceae_X	Dinophyceae_XX	Gymnodinium	Gymnodinium_dorsalisulcum;
DQ980478	RNA	Haptophytes	Chrysochromulinaceae	Eukaryota	Hacrobia	Haptophyta	Prymnesiophyceae	Prymnesiales	Chrysochromulinaceae	Chrysochromulina	Chrysochromulina_sp.;
EF172822.1.1358_U	RNA	Alveolates-Syndiniales	Dino-Group-I	Eukaryota	Alveolata	Dinophyta	Syndiniales	Dino-Group-I	Dino-Group-I-Clade-4	Dino-Group-I-Clade-4_X	Dino-Group-I-Clade-4_X_sp.;
EF172965.1.1680_U	RNA	Alveolates-Syndiniales	Dino-Group-II	Eukaryota	Alveolata	Dinophyta	Syndiniales	Dino-Group-II	Dino-Group-II-Clade-1	Dino-Group-II-Clade-1_X	Dino-Group-II-Clade-1_X_sp.;
EF172966	RNA	Haptophytes	Chrysochromulinaceae	Eukaryota	Hacrobia	Haptophyta	Prymnesiophyceae	Prymnesiales	Chrysochromulinaceae	Chrysochromulina	Chrysochromulina_sp.;
EF172976.1.1685_U	RNA	Stramenopiles-MAST	MAST-3	Eukaryota	Stramenopiles	Stramenopiles_X	MAST	MAST-3	MAST-3C	MAST-3C_X	MAST-3C_X_sp.;
EF173001.1.1670_U	RNA	Opisthokonts-Other	Choanoflagellida	Eukaryota	Opisthokonta	Choanoflagellida	Choanoflagellida_X	Choanoflagellida_XX	Choanoflagellida_XX_Clade-3	Choanoflagellida_XX_Clade-3_X	Choanoflagellida_XX_Clade-3_X_sp.;
EF173005.1.1679_U	RNA	Alveolates-Syndiniales	Dino-Group-II	Eukaryota	Alveolata	Dinophyta	Syndiniales	Dino-Group-II	Dino-Group-II-Clade-22	Dino-Group-II-Clade-22_X	Dino-Group-II-Clade-22_X_sp.;
EF196771.1.884_U	RNA	Opisthokonts-Other	Choanoflagellatea	Eukaryota	Opisthokonta	Choanoflagellida	Choanoflagellatea	Choanoflagellatea_X	Choanoflagellatea_X_Group_L	Choanoflagellatea_X_Group_L_X	Choanoflagellatea_X_Group_L_X_sp.;
EF526908.1.1342_U	RNA	Alveolates-Syndiniales	Dino-Group-II	Eukaryota	Alveolata	Dinophyta	Syndiniales	Dino-Group-II	Dino-Group-II-Clade-5	Dino-Group-II-Clade-5_X	Dino-Group-II-Clade-5_X_sp.;
EF526951.1.1389_U	RNA	Alveolates-Dinoflagellates	Dinophyceae	Eukaryota	Alveolata	Dinophyta	Dinophyceae	Dinophyceae_X	Dinophyceae_XX	Dinophyceae_XXX	Dinophyceae_XXX_sp.;
EF526991.1.1566_U	RNA	Alveolates-Dinoflagellates	Heterocapsa	Eukaryota	Alveolata	Dinophyta	Dinophyceae	Dinophyceae_X	Dinophyceae_XX	Heterocapsa	Heterocapsa_nei/rotundata;
EF527080.1.1343_U	RNA	Alveolates-Dinoflagellates	Dinophyceae	Eukaryota	Alveolata	Dinophyta	Dinophyceae	Dinophyceae_X	Dinophyceae_XX	Dinophyceae_XXX	Dinophyceae_XXX_sp.;
EF695190.1.835_U	RNA	Stramenopiles-Other	Florenciellales	Eukaryota	Stramenopiles	Ochrophyta	Dictyochophyceae	Dictyochophyceae_X	Florenciellales	Florenciellales_X	Florenciellales_X_sp.;
EF695202.1.817_U	RNA	Alveolates-Syndiniales	Dino-Group-III	Eukaryota	Alveolata	Dinophyta	Syndiniales	Dino-Group-III	Dino-Group-III_X	Dino-Group-III_XX	Dino-Group-III_XX_sp.;
EU143414.1.907_U	RNA	Archaeplastids-Chlorophytes	Pyramimonadales	Eukaryota	Archaeplastida	Chlorophyta	Pyramimonadales	Pyramimonadales_X	Pyramimonadales_XX	Halosphaera	Halosphaera_sp.;
EU143416.1.904_U	RNA	Archaeplastids-Chlorophytes	Pyramimonadales	Eukaryota	Archaeplastida	Chlorophyta	Pyramimonadales	Pyramimonadales_X	Pyramimonadales_XX	Halosphaera	Halosphaera_sp.;
EU287796.1.1798_U	RNA	Rhizaria-RAD (A,B,C)	RAD-A	Eukaryota	Rhizaria	Radiolaria	RAD-A	RAD-A_X	RAD-A_XX	RAD-A_XXX	RAD-A_XXX_sp.;
EU293235.1.1756_U	RNA	Alveolates-Dinoflagellates	Apicoporus	Eukaryota	Alveolata	Dinophyta	Dinophyceae	Dinophyceae_X	Dinophyceae_XX	Apicoporus	Apicoporus_glaber;
EU371327.1.1749_U	RNA	Alveolates-Dinoflagellates	Dinophyceae	Eukaryota	Alveolata	Dinophyta	Dinophyceae	Dinophyceae_X	Dinophyceae_XX	Dinophyceae_XXX	Dinophyceae_XXX_sp.;
EU499961	RNA	Haptophytes	Prymnesiophyceae_Clade_B4	Eukaryota	Hacrobia	Haptophyta	Prymnesiophyceae	Prymnesiales	Prymnesiophyceae_Clade_B4	Prymnesiophyceae_Clade_B4_X	Prymnesiophyceae_Clade_B4_X_sp.;
EU499985.1.853_U	RNA	Stramenopiles-MAST	MAST-7	Eukaryota	Stramenopiles	Stramenopiles_X	MAST	MAST-7	MAST-7B	MAST-7B_X	MAST-7B_X_sp.;
EU499988.1.803_U	RNA	Stramenopiles-Diatoms	Raphid-pennate	Eukaryota	Stramenopiles	Ochrophyta	Bacillariophyta	Bacillariophyta_X	Raphid-pennate	Raphid-pennate_X	Raphid-pennate_X_sp.;
EU500004.1.830_U	RNA	Alveolates-Ciliates	Spirotrichea	Eukaryota	Alveolata	Ciliophora	Spirotrichea	Strombidiida	Tontoniidae_A	Tontoniidae_A_X	Tontoniidae_A_X_sp.;
EU500032.1.821_U	RNA	Alveolates-Dinoflagellates	Dinophyceae	Eukaryota	Alveolata	Dinophyta	Dinophyceae	Dinophyceae_X	Dinophyceae_XX	Dinophyceae_XXX	Dinophyceae_XXX_sp.;
EU500059.1.825_U	RNA	Alveolates-Syndiniales	Dino-Group-II	Eukaryota	Alveolata	Dinophyta	Syndiniales	Dino-Group-II	Dino-Group-II-Clade-1	Dino-Group-II-Clade-1_X	Dino-Group-II-Clade-1_X_sp.;
EU500060.1.820_U	RNA	Alveolates-Syndiniales	Dino-Group-II	Eukaryota	Alveolata	Dinophyta	Syndiniales	Dino-Group-II	Dino-Group-II-Clade-1	Dino-Group-II-Clade-1_X	Dino-Group-II-Clade-1_X_sp.;
EU500083.1.815_U	RNA	Stramenopiles-Pelagophytes	Pelagophyceae	Eukaryota	Stramenopiles	Ochrophyta	Pelagophyceae	Pelagophyceae_X	Pelagophyceae_XX	Pelagophyceae_XXX	Pelagophyceae_XXX_sp.;
EU500115.1.802_U	RNA	Alveolates-Dinoflagellates	Dinophyceae	Eukaryota	Alveolata	Dinophyta	Dinophyceae	Dinophyceae_X	Dinophyceae_XX	Dinophyceae_XXX	Dinophyceae_XXX_sp.;
EU545707.1.962_U	RNA	Stramenopiles-MAST	MAST-1	Eukaryota	Stramenopiles	Stramenopiles_X	MAST	MAST-1	MAST-1C	MAST-1C_X	MAST-1C_X_sp.;
EU733575.1.1049_UC	RNA	Opisthokont-Fungi	Other-unclassified	Eukaryota	Opisthokonta	Fungi	Ascomycota	Pezizomycotina	Sordariomycetes	Sordariomycetes_X	Sordariomycetes_X_sp.;
EU754117.1.1022_U	RNA	Opisthokont-Fungi	Other-unclassified	Eukaryota	Opisthokonta	Fungi	Ascomycota	Pezizomycotina	Pezizomycotina_X	Phaeobotryosphaeria	Phaeobotryosphaeria_visci;
EU780611.1.1669_U	RNA	Alveolates-Syndiniales	Dino-Group-II	Eukaryota	Alveolata	Dinophyta	Syndiniales	Dino-Group-II	Dino-Group-II-Clade-10-and-11	Dino-Group-II-Clade-10-and-11_X	Dino-Group-II-Clade-10-and-11_X_sp.;
EU793266.1.1551_U	RNA	Alveolates-Syndiniales	Dino-Group-II	Eukaryota	Alveolata	Dinophyta	Syndiniales	Dino-Group-II	Dino-Group-II-Clade-17	Dino-Group-II-Clade-17_X	Dino-Group-II-Clade-17_X_sp.;
EU793684.1.1573_U	RNA	Alveolates-Syndiniales	Dino-Group-II	Eukaryota	Alveolata	Dinophyta	Syndiniales	Dino-Group-II	Dino-Group-II-Clade-1	Dino-Group-II-Clade-1_X	Dino-Group-II-Clade-1_X_sp.;
EU793941.1.922_U	RNA	Alveolates-Dinoflagellates	Suessiales	Eukaryota	Alveolata	Dinophyta	Dinophyceae	Suessiales	Suessiales_X	Suessiales_XX	Suessiales_XX_sp.;
FJ000096.1.1389_U	RNA	Alveolates-Syndiniales	Dino-Group-III	Eukaryota	Alveolata	Dinophyta	Syndiniales	Dino-Group-III	Dino-Group-III_X	Dino-Group-III_XX	Dino-Group-III_XX_sp.;
FJ000199.1.1378_U	RNA	Alveolates-Dinoflagellates	Dinophyceae	Eukaryota	Alveolata	Dinophyta	Dinophyceae	Dinophyceae_X	Dinophyceae_XX	Dinophyceae_XXX	Dinophyceae_XXX_sp.;
FJ000250.1.1382_U	RNA	Alveolates-Dinoflagellates	Dinophyceae	Eukaryota	Alveolata	Dinophyta	Dinophyceae	Dinophyceae_X	Dinophyceae_XX	Dinophyceae_XXX	Dinophyceae_XXX_sp.;
FJ032659.1.1674_U	RNA	Stramenopiles-Pelagophytes	Pelagophyceae	Eukaryota	Stramenopiles	Ochrophyta	Pelagophyceae	Pelagophyceae_X	Pelagophyceae_XX	Pelagophyceae_XXX	Pelagophyceae_XXX_sp.;
FJ217814.1.1521_U	RNA	Alveolates-Dinoflagellates	Azadinium	Eukaryota	Alveolata	Dinophyta	Dinophyceae	Dinophyceae_X	Dinophyceae_XX	Azadinium	Azadinium_spinosum;
FJ389787.1.846_U	RNA	Stramenopiles-Other	Thraustochytriaceae	Eukaryota	Stramenopiles	Stramenopiles_X	Labyrinthulea	Thraustochytriales	Thraustochytriaceae	Thraustochytriaceae_X	Thraustochytriaceae_X_sp.;
FJ393442.1.1001_U	RNA	Opisthokont-Fungi	Other-unclassified	Eukaryota	Opisthokonta	Fungi	Ascomycota	Pezizomycotina	Sordariomycetes	Sordariomycetes_X	Sordariomycetes_X_sp.;
FJ431454	RNA	Haptophytes	Chrysochromulinaceae	Eukaryota	Hacrobia	Haptophyta	Prymnesiophyceae	Prymnesiales	Chrysochromulinaceae	Chrysochromulina	Chrysochromulina_sp.;
FJ431723.1.830_U	RNA	Alveolates-Syndiniales	Dino-Group-III	Eukaryota	Alveolata	Dinophyta	Syndiniales	Dino-Group-III	Dino-Group-III_X	Dino-Group-III_XX	Dino-Group-III_XX_sp.;
FJ541189.1.1448_U	RNA	Alveolates-Dinoflagellates	Blastodinium	Eukaryota	Alveolata	Dinophyta	Dinophyceae	Dinophyceae_X	Dinophyceae_XX	Blastodinium	Blastodinium_pruvoti;
FJ663049.1.1216_U	RNA	Alveolates-Dinoflagellates	Chytriodinium	Eukaryota	Alveolata	Dinophyta	Dinophyceae	Dinophyceae_X	Dinophyceae_XX	Chytriodinium	Chytriodinium_roseum;
FJ790208.1.1771_U	RNA	Alveolates-Ciliates	Spirotrichea	Eukaryota	Alveolata	Ciliophora	Spirotrichea	Choreotrichida	Strombidinopsidae	Strombidinopsis	Strombidinopsis_acuminata;
FJ824125.1.1823_U	RNA	Rhizaria-Cercozoa	Protaspa	Eukaryota	Rhizaria	Cercozoa	Filosa-Thecofilosea	Cryomonadida	Protaspa-lineage	Protaspa	Protaspa_longipes;
FN598230.1.1131_U	RNA	Alveolates-Dinoflagellates	Dinophyceae	Eukaryota	Alveolata	Dinophyta	Dinophyceae	Dinophyceae_X	Dinophyceae_XX	Dinophyceae_XXX	Dinophyceae_XXX_sp.;
FN599060	RNA	Haptophytes	Chrysochromulinaceae	Eukaryota	Hacrobia	Haptophyta	Prymnesiophyceae	Prymnesiales	Chrysochromulinaceae	Chrysochromulina	Chrysochromulina_strobilus;
FN690221.1.1692_U	RNA	Alveolates-Dinoflagellates	Dinophyceae	Eukaryota	Alveolata	Dinophyta	Dinophyceae	Dinophyceae_X	Dinophyceae_XX	Dinophyceae_XXX	Dinophyceae_XXX_sp.;
FN690303.1.1694_U	RNA	Alveolates-Dinoflagellates	Dinophyceae	Eukaryota	Alveolata	Dinophyta	Dinophyceae	Dinophyceae_X	Dinophyceae_XX	Dinophyceae_XXX	Dinophyceae_XXX_sp.;
FN690307.1.1682_U	RNA	Alveolates-Dinoflagellates	Dinophyceae	Eukaryota	Alveolata	Dinophyta	Dinophyceae	Dinophyceae_X	Dinophyceae_XX	Dinophyceae_XXX	Dinophyceae_XXX_sp.;
FR865631.2.1774_U	RNA	Alveolates-Dinoflagellates	Peridinium	Eukaryota	Alveolata	Dinophyta	Dinophyceae	Dinophyceae_X	Dinophyceae_XX	Peridinium	Peridinium_inconspicuum;
GQ365768.1.1539_U	RNA	Other/unknown	Telonemia	Eukaryota	Hacrobia	Telonemia	Telonemia_X	Telonemia_XX	Telonemia-Group-2	Telonemia-Group-2_X	Telonemia-Group-2_X_sp.;
GQ365842.1.1553_U	RNA	Other/unknown	Telonemia	Eukaryota	Hacrobia	Telonemia	Telonemia_X	Telonemia_XX	Telonemia-Group-1	Telonemia-Group-1_X	Telonemia-Group-1_X_sp.;
GQ365865.1.1537_U	RNA	Other/unknown	Telonemia	Eukaryota	Hacrobia	Telonemia	Telonemia_X	Telonemia_XX	Telonemia-Group-2	Telonemia-Group-2_X	Telonemia-Group-2_X_sp.;
GQ410644.1.1808_U	RNA	Opisthokont-Metazoa	Arthropoda	Eukaryota	Opisthokonta	Metazoa	Arthropoda	Hexapoda	Insecta	Isostasius	Isostasius_sp.;
GQ863785.1.1606_U	RNA	Stramenopiles-MAST	MAST-3	Eukaryota	Stramenopiles	Stramenopiles_X	MAST	MAST-3	MAST-3A	MAST-3A_X	MAST-3A_X_sp.;
GQ863812.1.1599_U	RNA	Archaeplastids-Chlorophytes	Pyramimonadales	Eukaryota	Archaeplastida	Chlorophyta	Pyramimonadales	Pyramimonadales_X	Pyramimonadales_XX	Halosphaera	Halosphaera_sp.;
GQ863814.1.1651_U	RNA	Cryptophytes	Other-unclassified	Eukaryota	Hacrobia	Cryptophyta	Cryptophyceae	Cryptophyceae_X	Goniomonadales	Goniomonas	Goniomonas_sp.;
GU060423.1.836_U	RNA	Rhizaria-Foraminifera	Other-unclassified	Eukaryota	Rhizaria	Foraminifera	Globothalamea	Rotaliida	Globigerinacea	Globigerina	Globigerina_bulloides;
GU117672.1.1549_U	RNA	Other/unknown	Telonemia	Eukaryota	Hacrobia	Telonemia	Telonemia_X	Telonemia_XX	Telonemia-Group-2	Telonemia-Group-2_X	Telonemia-Group-2_X_sp.;
GU117678.1.1550_U	RNA	Other/unknown	Telonemia	Eukaryota	Hacrobia	Telonemia	Telonemia_X	Telonemia_XX	Telonemia-Group-2	Telonemia-Group-2_X	Telonemia-Group-2_X_sp.;
GU196150.1.1374_U	RNA	Stramenopiles-Pelagophytes	Pelagomonadaceae_clade_A	Eukaryota	Stramenopiles	Ochrophyta	Pelagophyceae	Pelagomonadales	Pelagomonadaceae	Pelagomonadaceae_clade_A	Pelagomonadaceae_clade_A_sp.;
GU206561.1.1703_U	RNA	Alveolates-Ciliates	Spirotrichea	Eukaryota	Alveolata	Ciliophora	Spirotrichea	Strombidiida	Strombidiidae_N	Strombidium_N	Strombidium_N_sp.;
GU256914.1.941_U	RNA	Stramenopiles-Other	Blastocystis	Eukaryota	Stramenopiles	Stramenopiles_X	Opalinata	Opalinata_X	Blastocystis-Group	Blastocystis	Blastocystis_sp.;
GU327677.1.1791_U	RNA	Alveolates-Dinoflagellates	Prorocentrum	Eukaryota	Alveolata	Dinophyta	Dinophyceae	Dinophyceae_X	Dinophyceae_XX	Prorocentrum	Prorocentrum_pseudopanamense;
GU361536.1.1693_UC	RNA	Opisthokont-Fungi	Other-unclassified	Eukaryota	Opisthokonta	Fungi	Ascomycota	Pezizomycotina	Eurotiomycetes	Penicillium	Penicillium_sp.;
GU647171.1.1538_U	RNA	Alveolates-Dinoflagellates	Prorocentrum	Eukaryota	Alveolata	Dinophyta	Dinophyceae	Dinophyceae_X	Dinophyceae_XX	Prorocentrum	Prorocentrum_sp.;
GU819270.1.1374_U	RNA	Alveolates-Ciliates	Spirotrichea	Eukaryota	Alveolata	Ciliophora	Spirotrichea	Strombidiida	Strombidiidae_G	Strombidiidae_G_X	Strombidiidae_G_X_sp.;
GU819785.1.1391_U	RNA	Alveolates-Syndiniales	Dino-Group-I	Eukaryota	Alveolata	Dinophyta	Syndiniales	Dino-Group-I	Dino-Group-I-Clade-3	Dino-Group-I-Clade-3_X	Dino-Group-I-Clade-3_X_sp.;
GU820011.1.1239_U	RNA	Alveolates-Syndiniales	Dino-Group-I	Eukaryota	Alveolata	Dinophyta	Syndiniales	Dino-Group-I	Dino-Group-I-Clade-1	Dino-Group-I-Clade-1_X	Dino-Group-I-Clade-1_X_sp.;
GU820631.1.1072_U	RNA	Alveolates-Syndiniales	Dino-Group-II	Eukaryota	Alveolata	Dinophyta	Syndiniales	Dino-Group-II	Dino-Group-II-Clade-1	Dino-Group-II-Clade-1_X	Dino-Group-II-Clade-1_X_sp.;
GU821355.1.1065_U	RNA	Rhizaria-Acantharia	Chaunacanthida	Eukaryota	Rhizaria	Radiolaria	Acantharea	Chaunacanthida	Chaunacanthida_X	Chaunacanthida_XX	Chaunacanthida_XX_sp.;
GU821638.1.1127_U	RNA	Rhizaria-Polycystines	Spumellarida-Group-I	Eukaryota	Rhizaria	Radiolaria	Polycystinea	Spumellarida	Spumellarida-Group-I	Spumellarida-Group-I_X	Spumellarida-Group-I_X_sp.;
GU822529.1.1386_U	RNA	Rhizaria-Acantharia	Chaunacanthida	Eukaryota	Rhizaria	Radiolaria	Acantharea	Chaunacanthida	Chaunacanthida_X	Chaunacanthida_XX	Chaunacanthida_XX_sp.;
GU823216.1.1365_U	RNA	Stramenopiles-MAST	MAST-3	Eukaryota	Stramenopiles	Stramenopiles_X	MAST	MAST-3	MAST-3I	MAST-3I_X	MAST-3I_X_sp.;
GU823438.1.1073_U	RNA	Stramenopiles-Other	MOCH-5	Eukaryota	Stramenopiles	Stramenopiles_X	MOCH	MOCH-5	MOCH-5_X	MOCH-5_XX	MOCH-5_XX_sp.;
GU823638.1.1394_U	RNA	Stramenopiles-Diatoms	Raphid-pennate	Eukaryota	Stramenopiles	Ochrophyta	Bacillariophyta	Bacillariophyta_X	Raphid-pennate	Raphid-pennate_X	Raphid-pennate_X_sp.;
GU824299.1.1073_U	RNA	Alveolates-Dinoflagellates	Dinophyceae	Eukaryota	Alveolata	Dinophyta	Dinophyceae	Dinophyceae_X	Dinophyceae_XX	Dinophyceae_XXX	Dinophyceae_XXX_sp.;
GU824513.1.1198_U	RNA	Alveolates-Dinoflagellates	Dinophyceae	Eukaryota	Alveolata	Dinophyta	Dinophyceae	Dinophyceae_X	Dinophyceae_XX	Dinophyceae_XXX	Dinophyceae_XXX_sp.;
GU824677.1.1204_U	RNA	Alveolates-Syndiniales	Dino-Group-II	Eukaryota	Alveolata	Dinophyta	Syndiniales	Dino-Group-II	Dino-Group-II-Clade-10-and-11	Dino-Group-II-Clade-10-and-11_X	Dino-Group-II-Clade-10-and-11_X_sp.;
GU824763.1.1200_U	RNA	Alveolates-Dinoflagellates	Dinophyceae	Eukaryota	Alveolata	Dinophyta	Dinophyceae	Dinophyceae_X	Dinophyceae_XX	Dinophyceae_XXX	Dinophyceae_XXX_sp.;
GU824815.1.1070_U	RNA	Alveolates-Dinoflagellates	Dinophyceae	Eukaryota	Alveolata	Dinophyta	Dinophyceae	Dinophyceae_X	Dinophyceae_XX	Dinophyceae_XXX	Dinophyceae_XXX_sp.;
GU824959.1.1199_U	RNA	Alveolates-Dinoflagellates	Dinophyceae	Eukaryota	Alveolata	Dinophyta	Dinophyceae	Dinophyceae_X	Dinophyceae_XX	Dinophyceae_XXX	Dinophyceae_XXX_sp.;
GU825043.1.1199_U	RNA	Alveolates-Dinoflagellates	Dinophyceae	Eukaryota	Alveolata	Dinophyta	Dinophyceae	Dinophyceae_X	Dinophyceae_XX	Dinophyceae_XXX	Dinophyceae_XXX_sp.;
GU825088.1.1075_U	RNA	Alveolates-Dinoflagellates	Dinophyceae	Eukaryota	Alveolata	Dinophyta	Dinophyceae	Dinophyceae_X	Dinophyceae_XX	Dinophyceae_XXX	Dinophyceae_XXX_sp.;
GU825103.1.1200_U	RNA	Alveolates-Dinoflagellates	Dinophyceae	Eukaryota	Alveolata	Dinophyta	Dinophyceae	Dinophyceae_X	Dinophyceae_XX	Dinophyceae_XXX	Dinophyceae_XXX_sp.;
GU825315.1.1202_U	RNA	Alveolates-Dinoflagellates	Dinophyceae	Eukaryota	Alveolata	Dinophyta	Dinophyceae	Dinophyceae_X	Dinophyceae_XX	Dinophyceae_XXX	Dinophyceae_XXX_sp.;
HE611580.1.1746_U	RNA	Alveolates-Dinoflagellates	Gyrodinium	Eukaryota	Alveolata	Dinophyta	Dinophyceae	Dinophyceae_X	Dinophyceae_XX	Gyrodinium	Gyrodinium_sp.;
HG970975	RNA	Haptophytes	Haptophyta	Eukaryota	Hacrobia	Haptophyta	Haptophyta_X	Haptophyta_XX	Haptophyta_XXX	Haptophyta_XXXX	Haptophyta_XXXX_sp.;
HM163291.1.1682_U	RNA	Stramenopiles-MAST	MAST-3	Eukaryota	Stramenopiles	Stramenopiles_X	MAST	MAST-3	MAST-3I	MAST-3I_X	MAST-3I_X_sp.;
HM561108.1.926_U	RNA	Alveolates-Dinoflagellates	Dinophyceae	Eukaryota	Alveolata	Dinophyta	Dinophyceae	Dinophyceae_X	Dinophyceae_XX	Dinophyceae_XXX	Dinophyceae_XXX_sp.;
HM561210.1.973_U	RNA	Rhizaria-Acantharia	Acantharea	Eukaryota	Rhizaria	Radiolaria	Acantharea	Acantharea_X	Acantharea_XX	Acantharea_XXX	Acantharea_XXX_sp.;
HM565912	RNA	Haptophytes	Prymnesiophyceae_Clade_D	Eukaryota	Hacrobia	Haptophyta	Prymnesiophyceae	Prymnesiophyceae_Clade_D	Prymnesiophyceae_Clade_D_X	Prymnesiophyceae_Clade_D_XX	Prymnesiophyceae_Clade_D_XX_sp.;
HM581705.1.1793_U	RNA	Alveolates-Dinoflagellates	Dinophyceae	Eukaryota	Alveolata	Dinophyta	Dinophyceae	Dinophyceae_X	Dinophyceae_XX	Dinophyceae_XXX	Dinophyceae_XXX_sp.;
HM581766.1.1782_U	RNA	Alveolates-Dinoflagellates	Prorocentrum	Eukaryota	Alveolata	Dinophyta	Dinophyceae	Dinophyceae_X	Dinophyceae_XX	Prorocentrum	Prorocentrum_sp.;
HM581788.1.1759_U	RNA	Alveolates-Ciliates	Spirotrichea	Eukaryota	Alveolata	Ciliophora	Spirotrichea	Strombidiida	Tontoniidae_B	Pseudotontonia	Pseudotontonia_sp.;
HM749923.1.1468_U	RNA	Alveolates-Dinoflagellates	Dinophyceae	Eukaryota	Alveolata	Dinophyta	Dinophyceae	Dinophyceae_X	Dinophyceae_XX	Dinophyceae_XXX	Dinophyceae_XXX_sp.;
HM749951	RNA	Haptophytes	Chrysochromulinaceae	Eukaryota	Hacrobia	Haptophyta	Prymnesiophyceae	Prymnesiales	Chrysochromulinaceae	Chrysochromulina	Chrysochromulina_sp.;
HM771441.1.1856_U	RNA	Opisthokont-Metazoa	Mollusca	Eukaryota	Opisthokonta	Metazoa	Mollusca	Gastropoda	Vetigastropoda	Scutus	Scutus_howensis;
HM853763.1.1228_U	RNA	Alveolates-Dinoflagellates	Amphisolenia	Eukaryota	Alveolata	Dinophyta	Dinophyceae	Dinophysiales	Amphisoleniaceae	Amphisolenia	Amphisolenia_bidentata;
HM853772.1.1218_U	RNA	Alveolates-Dinoflagellates	Phalacroma	Eukaryota	Alveolata	Dinophyta	Dinophyceae	Dinophysiales	Dinophysaceae_Oxyphysaceae	Phalacroma	Phalacroma_parvulum;
HM853805.1.1191_U	RNA	Alveolates-Dinoflagellates	Dinophysis	Eukaryota	Alveolata	Dinophyta	Dinophyceae	Dinophysiales	Dinophysaceae_Oxyphysaceae	Dinophysis	Dinophysis_hastata;
HM853807.1.1221_U	RNA	Alveolates-Dinoflagellates	Dinophysis	Eukaryota	Alveolata	Dinophyta	Dinophyceae	Dinophysiales	Dinophysaceae_Oxyphysaceae	Dinophysis	Dinophysis_acutissima;
HM997070.1.906_U	RNA	Opisthokont-Metazoa	Arthropoda	Eukaryota	Opisthokonta	Metazoa	Arthropoda	Crustacea	Maxillopoda	Paracalanus	Paracalanus_parvus;
HQ394050.1.837_U	RNA	Alveolates-Dinoflagellates	Dinophyceae	Eukaryota	Alveolata	Dinophyta	Dinophyceae	Dinophyceae_X	Dinophyceae_XX	Dinophyceae_XXX	Dinophyceae_XXX_sp.;
HQ438117.1.1608_U	RNA	Alveolates-Dinoflagellates	Dinophyceae	Eukaryota	Alveolata	Dinophyta	Dinophyceae	Dinophyceae_X	Dinophyceae_XX	Dinophyceae_XXX	Dinophyceae_XXX_sp.;
HQ438176.1.1600_U	RNA	Alveolates-Dinoflagellates	Dinophyceae	Eukaryota	Alveolata	Dinophyta	Dinophyceae	Dinophyceae_X	Dinophyceae_XX	Dinophyceae_XXX	Dinophyceae_XXX_sp.;
HQ864929	RNA	Haptophytes	Prymnesiophyceae_Clade_B3	Eukaryota	Hacrobia	Haptophyta	Prymnesiophyceae	Prymnesiales	Prymnesiophyceae_Clade_B3	Prymnesiophyceae_Clade_B3_X	Prymnesiophyceae_Clade_B3_X_sp.;
HQ865407.1.885_U	RNA	Alveolates-Syndiniales	Dino-Group-V	Eukaryota	Alveolata	Dinophyta	Syndiniales	Dino-Group-V	Dino-Group-V_X	Dino-Group-V_XX	Dino-Group-V_XX_sp.;
HQ865470.1.885_U	RNA	Alveolates-Syndiniales	Dino-Group-III	Eukaryota	Alveolata	Dinophyta	Syndiniales	Dino-Group-III	Dino-Group-III_X	Dino-Group-III_XX	Dino-Group-III_XX_sp.;
HQ865660.1.874_U	RNA	Alveolates-Ciliates	Spirotrichea	Eukaryota	Alveolata	Ciliophora	Spirotrichea	Strombidiida	Strombidiidae	Strombidium	Strombidium_sp.;
HQ865735.1.882_U	RNA	Alveolates-Dinoflagellates	Dinophyceae	Eukaryota	Alveolata	Dinophyta	Dinophyceae	Dinophyceae_X	Dinophyceae_XX	Dinophyceae_XXX	Dinophyceae_XXX_sp.;
HQ866158.1.873_U	RNA	Alveolates-Ciliates	Prostomatea	Eukaryota	Alveolata	Ciliophora	Prostomatea	Prostomatea_X	Colepidae	Colepidae_X	Colepidae_X_sp.;
HQ866199.1.872_U	RNA	Alveolates-Ciliates	Spirotrichea	Eukaryota	Alveolata	Ciliophora	Spirotrichea	Strombidiida_F	Strombidiida_F_X	Strombidiida_F_XX	Strombidiida_F_XX_sp.;
HQ866263.1.888_U	RNA	Alveolates-Syndiniales	Dino-Group-II	Eukaryota	Alveolata	Dinophyta	Syndiniales	Dino-Group-II	Dino-Group-II-Clade-30	Dino-Group-II-Clade-30_X	Dino-Group-II-Clade-30_X_sp.;
HQ866297.1.886_U	RNA	Stramenopiles-Other	Aplanochytrium	Eukaryota	Stramenopiles	Stramenopiles_X	Labyrinthulea	Labyrinthulales	Labyrinthulaceae	Aplanochytrium	Aplanochytrium_sp.;
HQ867071.1.870_U	RNA	Alveolates-Ciliates	Spirotrichea	Eukaryota	Alveolata	Ciliophora	Spirotrichea	Strombidiida_G	Strombidiida_G_X	Strombidiida_G_XX	Strombidiida_G_XX_sp.;
HQ867355.1.870_U	RNA	Alveolates-Dinoflagellates	Dinophyceae	Eukaryota	Alveolata	Dinophyta	Dinophyceae	Dinophyceae_X	Dinophyceae_XX	Dinophyceae_XXX	Dinophyceae_XXX_sp.;
HQ867760.1.875_U	RNA	Alveolates-Dinoflagellates	Dinophyceae	Eukaryota	Alveolata	Dinophyta	Dinophyceae	Dinophyceae_X	Dinophyceae_XX	Dinophyceae_XXX	Dinophyceae_XXX_sp.;
HQ867771.1.885_U	RNA	Other/unknown	Centroheliozoa	Eukaryota	Hacrobia	Centroheliozoa	Centroheliozoa_X	Pterocystida	Pterocystida_X	Pterocystida_XX	Pterocystida_XX_sp.;
HQ868549.1.880_U	RNA	Alveolates-Dinoflagellates	Gyrodinium	Eukaryota	Alveolata	Dinophyta	Dinophyceae	Dinophyceae_X	Dinophyceae_XX	Gyrodinium	Gyrodinium_spirale;
HQ868978.1.936_U	RNA	Opisthokont-Fungi	Other-unclassified	Eukaryota	Opisthokonta	Fungi	Chytridiomycota	Chytridiomycotina	Chytridiomycetes	Chytridiomycetes_X	Chytridiomycetes_X_sp.;
HQ868988.1.916_U	RNA	Rhizaria-Cercozoa	Protaspa-lineage	Eukaryota	Rhizaria	Cercozoa	Filosa-Thecofilosea	Cryomonadida	Protaspa-lineage	Protaspa-lineage_X	Protaspa-lineage_X_sp.;
HQ869158.1.867_U	RNA	Alveolates-Dinoflagellates	Gyrodinium	Eukaryota	Alveolata	Dinophyta	Dinophyceae	Dinophyceae_X	Dinophyceae_XX	Gyrodinium	Gyrodinium_spirale;
HQ869389	RNA	Haptophytes	Chrysochromulinaceae	Eukaryota	Hacrobia	Haptophyta	Prymnesiophyceae	Prymnesiales	Chrysochromulinaceae	Chrysochromulina	Chrysochromulina_sp.;
HQ869653.1.906_U	RNA	Other/unknown	Telonemia	Eukaryota	Hacrobia	Telonemia	Telonemia_X	Telonemia_XX	Telonemia-Group-1	Telonemia-Group-1_X	Telonemia-Group-1_X_sp.;
HQ869716.1.901_U	RNA	Alveolates-Syndiniales	Dino-Group-II	Eukaryota	Alveolata	Dinophyta	Syndiniales	Dino-Group-II	Dino-Group-II_X	Dino-Group-II_XX	Dino-Group-II_XX_sp.;
HQ870129.1.849_U	RNA	Alveolates-Syndiniales	Dino-Group-II	Eukaryota	Alveolata	Dinophyta	Syndiniales	Dino-Group-II	Dino-Group-II-Clade-3	Dino-Group-II-Clade-3_X	Dino-Group-II-Clade-3_X_sp.;
HQ870326	RNA	Haptophytes	Chrysochromulinaceae	Eukaryota	Hacrobia	Haptophyta	Prymnesiophyceae	Prymnesiales	Chrysochromulinaceae	Chrysochromulina	Chrysochromulina_sp.;
HQ870382.1.851_U	RNA	Alveolates-Syndiniales	Dino-Group-II	Eukaryota	Alveolata	Dinophyta	Syndiniales	Dino-Group-II	Dino-Group-II-Clade-30	Dino-Group-II-Clade-30_X	Dino-Group-II-Clade-30_X_sp.;
HQ870455.1.848_U	RNA	Alveolates-Syndiniales	Dino-Group-II	Eukaryota	Alveolata	Dinophyta	Syndiniales	Dino-Group-II	Dino-Group-II-Clade-1	Dino-Group-II-Clade-1_X	Dino-Group-II-Clade-1_X_sp.;
HQ870498.1.849_U	RNA	Alveolates-Syndiniales	Dino-Group-III	Eukaryota	Alveolata	Dinophyta	Syndiniales	Dino-Group-III	Dino-Group-III_X	Dino-Group-III_XX	Dino-Group-III_XX_sp.;
HQ870905.1.848_U	RNA	Other/unknown	Telonemia	Eukaryota	Hacrobia	Telonemia	Telonemia_X	Telonemia_XX	Telonemia-Group-2	Telonemia-Group-2_X	Telonemia-Group-2_X_sp.;
JF305343.1.820_U	RNA	Alveolates-Ciliates	Spirotrichea	Eukaryota	Alveolata	Ciliophora	Spirotrichea	Choreotrichida	Leegaardiellidae_B	Leegaardiella	Leegaardiella_sp.;
JF346259.1.1818_U	RNA	Opisthokont-Metazoa	Arthropoda	Eukaryota	Opisthokonta	Metazoa	Arthropoda	Crustacea	Malacostraca	Parastylodactylus	Parastylodactylus_bimaxillaris;
JF698780.1.1619_U	RNA	Alveolates-Syndiniales	Dino-Group-I	Eukaryota	Alveolata	Dinophyta	Syndiniales	Dino-Group-I	Dino-Group-I-Clade-5	Dino-Group-I-Clade-5_X	Dino-Group-I-Clade-5_X_sp.;
JF719081.1.1357_U	RNA	Opisthokont-Fungi	Other-unclassified	Eukaryota	Opisthokonta	Fungi	Ascomycota	Pezizomycotina	Dothideomycetes	Dothideomycetes_X	Dothideomycetes_X_sp.;
JN811152.1.1711_U	RNA	Rhizaria-Acantharia	Amphilonche	Eukaryota	Rhizaria	Radiolaria	Acantharea	Arthracanthida-Symphyacanthida	Arthracanthida-Symphyacanthida_X	Amphilonche	Amphilonche_elongata;
JN811182.1.1653_U	RNA	Rhizaria-Acantharia	Staurolithium	Eukaryota	Rhizaria	Radiolaria	Acantharea	Acantharea_X	Acantharea_XX	Staurolithium	Staurolithium_sp.;
JN811184.1.1663_U	RNA	Rhizaria-Acantharia	Acanthocolla	Eukaryota	Rhizaria	Radiolaria	Acantharea	Acantharea_X	Acantharea_XX	Acanthocolla	Acanthocolla_solidissima;
JN811212.1.1696_U	RNA	Rhizaria-Acantharia	Heteracon	Eukaryota	Rhizaria	Radiolaria	Acantharea	Chaunacanthida	Chaunacanthida_X	Heteracon	Heteracon_biformis;
JN816839.1.934_U	RNA	Opisthokont-Metazoa	Arthropoda	Eukaryota	Opisthokonta	Metazoa	Arthropoda	Chelicerata	Arachnida	Plexippus	Plexippus_paykulli;
JN832805.1.886_U	RNA	Alveolates-Syndiniales	Dino-Group-II	Eukaryota	Alveolata	Dinophyta	Syndiniales	Dino-Group-II	Dino-Group-II-Clade-10-and-11	Dino-Group-II-Clade-10-and-11_X	Dino-Group-II-Clade-10-and-11_X_sp.;
JN936472.1.1794_U	RNA	Opisthokont-Metazoa	Annelida	Eukaryota	Opisthokonta	Metazoa	Annelida	Annelida_X	Annelida_XX	Annelida_XXX	Annelida_XXX_sp.;
JQ028734.1.1679_U	RNA	Alveolates-Ciliates	Spirotrichea	Eukaryota	Alveolata	Ciliophora	Spirotrichea	Choreotrichida	Strombidinopsidae	Strombidinopsis	Strombidinopsis_acuminata;
JQ179860.1.1656_U	RNA	Alveolates-Dinoflagellates	Amphidinium	Eukaryota	Alveolata	Dinophyta	Dinophyceae	Dinophyceae_X	Dinophyceae_XX	Amphidinium	Amphidinium_semilunatum;
JQ223245.1.1625_U	RNA	Opisthokonts-Other	Choanoflagellida	Eukaryota	Opisthokonta	Choanoflagellida	Choanoflagellida_X	Choanoflagellida_XX	Choanoflagellida_XX_Clade-3	Choanoflagellida_XX_Clade-3_X	Choanoflagellida_XX_Clade-3_X_sp.;
JQ781935.1.1793_U	RNA	Stramenopiles-MAST	MAST-7	Eukaryota	Stramenopiles	Stramenopiles_X	MAST	MAST-7	MAST-7D	MAST-7D_X	MAST-7D_X_sp.;
JQ781949.1.1784_U	RNA	Stramenopiles-MAST	MAST-1	Eukaryota	Stramenopiles	Stramenopiles_X	MAST	MAST-1	MAST-1D	MAST-1D_X	MAST-1D_X_sp.;
JQ781961.1.1805_U	RNA	Stramenopiles-MAST	MAST-4	Eukaryota	Stramenopiles	Stramenopiles_X	MAST	MAST-4	MAST-4A	MAST-4A_X	MAST-4A_X_sp.;
JQ781966.1.1811_U	RNA	Stramenopiles-Pelagophytes	Pelagomonas	Eukaryota	Stramenopiles	Ochrophyta	Pelagophyceae	Pelagomonadales	Pelagomonadaceae	Pelagomonas	Pelagomonas_calceolata;
JQ781972.1.1807_U	RNA	Stramenopiles-MAST	MAST-8	Eukaryota	Stramenopiles	Stramenopiles_X	MAST	MAST-8	MAST-8B	MAST-8B_X	MAST-8B_X_sp.;
JQ781997.1.1810_U	RNA	Stramenopiles-MAST	MAST-3	Eukaryota	Stramenopiles	Stramenopiles_X	MAST	MAST-3	MAST-3E	MAST-3E_X	MAST-3E_X_sp.;
JQ782035.1.1781_U	RNA	Stramenopiles-MAST	MAST-3	Eukaryota	Stramenopiles	Stramenopiles_X	MAST	MAST-3	MAST-3I	MAST-3I_X	MAST-3I_X_sp.;
JX178804.1.1776_U	RNA	Alveolates-Ciliates	Spirotrichea	Eukaryota	Alveolata	Ciliophora	Spirotrichea	Strombidiida	Tontoniidae_B	Pseudotontonia	Pseudotontonia_sp.;
JX188296.1.1777_U	RNA	Rhizaria-RAD (A,B,C)	RAD-A	Eukaryota	Rhizaria	Radiolaria	RAD-A	RAD-A_X	RAD-A_XX	RAD-A_XXX	RAD-A_XXX_sp.;
JX188303.1.1756_U	RNA	Alveolates-Syndiniales	Dino-Group-II	Eukaryota	Alveolata	Dinophyta	Syndiniales	Dino-Group-II	Dino-Group-II-Clade-3	Dino-Group-II-Clade-3_X	Dino-Group-II-Clade-3_X_sp.;
JX188315.1.1762_U	RNA	Archaeplastids-Chlorophytes	Prasino-Clade-VII	Eukaryota	Archaeplastida	Chlorophyta	Prasino-Clade-VII	Prasino-Clade-VII_X	Prasino-Clade-VII-A	Prasino-Clade-VII-A_X	Prasino-Clade-VII-A_X_sp.;
JX188331.1.1726_U	RNA	Alveolates-Ciliates	Oligohymenophorea	Eukaryota	Alveolata	Ciliophora	Oligohymenophorea	Scuticociliatia	Scuticociliatia-1	Scuticociliatia-1_X	Scuticociliatia-1_X_sp.;
JX188359.1.1732_U	RNA	Rhizaria-Acantharia	Acantharea	Eukaryota	Rhizaria	Radiolaria	Acantharea	Acantharea_X	Acantharea_XX	Acantharea_XXX	Acantharea_XXX_sp.;
JX660992	RNA	Haptophytes	Phaeocystaceae	Eukaryota	Hacrobia	Haptophyta	Prymnesiophyceae	Phaeocystales	Phaeocystaceae	Phaeocystis	Phaeocystis_cordata;
JX840885.1.1013_U	RNA	Alveolates-Ciliates	Spirotrichea	Eukaryota	Alveolata	Ciliophora	Spirotrichea	Tintinnida	Tintinnidae	Tintinnidae_X	Tintinnidae_X_sp.;
KC488382.1.1651_U	RNA	Alveolates-Ciliates	Spirotrichea	Eukaryota	Alveolata	Ciliophora	Spirotrichea	Strombidiida	Strombidiidae_K	Strombidiidae_K_X	Strombidiidae_K_X_sp.;
KC488426.1.1709_U	RNA	Alveolates-Dinoflagellates	Gyrodinium	Eukaryota	Alveolata	Dinophyta	Dinophyceae	Dinophyceae_X	Dinophyceae_XX	Gyrodinium	Gyrodinium_sp.;
KC488435.1.1695_U	RNA	Alveolates-Dinoflagellates	Dinophyceae	Eukaryota	Alveolata	Dinophyta	Dinophyceae	Dinophyceae_X	Dinophyceae_XX	Dinophyceae_XXX	Dinophyceae_XXX_sp.;
KC488456	RNA	Haptophytes	Chrysochromulinaceae	Eukaryota	Hacrobia	Haptophyta	Prymnesiophyceae	Prymnesiales	Chrysochromulinaceae	Chrysochromulina	Chrysochromulina_sp.;
KC488470.1.1696_U	RNA	Alveolates-Syndiniales	Dino-Group-II	Eukaryota	Alveolata	Dinophyta	Syndiniales	Dino-Group-II	Dino-Group-II-Clade-12	Dino-Group-II-Clade-12_X	Dino-Group-II-Clade-12_X_sp.;
KC582887.1.1798_U	RNA	Alveolates-Syndiniales	Dino-Group-II	Eukaryota	Alveolata	Dinophyta	Syndiniales	Dino-Group-II	Dino-Group-II-Clade-22	Dino-Group-II-Clade-22_X	Dino-Group-II-Clade-22_X_sp.;
KC582931.1.1796_U	RNA	Alveolates-Syndiniales	Dino-Group-II	Eukaryota	Alveolata	Dinophyta	Syndiniales	Dino-Group-II	Dino-Group-II-Clade-10-and-11	Dino-Group-II-Clade-10-and-11_X	Dino-Group-II-Clade-10-and-11_X_sp.;
KC582936.1.1795_U	RNA	Alveolates-Dinoflagellates	Dinophyceae	Eukaryota	Alveolata	Dinophyta	Dinophyceae	Dinophyceae_X	Dinophyceae_XX	Dinophyceae_XXX	Dinophyceae_XXX_sp.;
KC582992.1.1792_U	RNA	Stramenopiles-MAST	MAST-3	Eukaryota	Stramenopiles	Stramenopiles_X	MAST	MAST-3	MAST-3L	MAST-3L_X	MAST-3L_X_sp.;
KC582997.1.1775_U	RNA	Stramenopiles-Chrysophytes	Chrysophyceae_Clade-I	Eukaryota	Stramenopiles	Ochrophyta	Chrysophyceae	Chrysophyceae_X	Chrysophyceae_Clade-I	Chrysophyceae_Clade-I_X	Chrysophyceae_Clade-I_X_sp.;
KC583018.1.1797_U	RNA	Stramenopiles-MAST	MAST-7	Eukaryota	Stramenopiles	Stramenopiles_X	MAST	MAST-7	MAST-7B	MAST-7B_X	MAST-7B_X_sp.;
KC583138.1.1098_U	RNA	Stramenopiles-Chrysophytes	Chrysophyceae_Clade-H	Eukaryota	Stramenopiles	Ochrophyta	Chrysophyceae	Chrysophyceae_X	Chrysophyceae_Clade-H	Chrysophyceae_Clade-H_X	Chrysophyceae_Clade-H_X_sp.;
KC583151.1.1101_U	RNA	Stramenopiles-Other	MOCH-5	Eukaryota	Stramenopiles	Stramenopiles_X	MOCH	MOCH-5	MOCH-5_X	MOCH-5_XX	MOCH-5_XX_sp.;
KF031759.1.1740_U	RNA	Stramenopiles-MAST	MAST-9	Eukaryota	Stramenopiles	Stramenopiles_X	MAST	MAST-9	MAST-9A	MAST-9A_X	MAST-9A_X_sp.;
KF031906.1.1773_U	RNA	Opisthokont-Metazoa	Urochordata	Eukaryota	Opisthokonta	Metazoa	Urochordata	Urochordata_X	Appendicularia	Appendicularia_X	Appendicularia_X_sp.;
KF049612.1.1086_U	RNA	Opisthokont-Fungi	Other-unclassified	Eukaryota	Opisthokonta	Fungi	Ascomycota	Pezizomycotina	Sordariomycetes	Polycephalomyces	Polycephalomyces_prolificus;
KF129640.1.1760_U	RNA	Alveolates-Syndiniales	Dino-Group-II	Eukaryota	Alveolata	Dinophyta	Syndiniales	Dino-Group-II	Dino-Group-II-Clade-22	Dino-Group-II-Clade-22_X	Dino-Group-II-Clade-22_X_sp.;
KF129737.1.1746_U	RNA	Alveolates-Syndiniales	Dino-Group-I	Eukaryota	Alveolata	Dinophyta	Syndiniales	Dino-Group-I	Dino-Group-I-Clade-4	Dino-Group-I-Clade-4_X	Dino-Group-I-Clade-4_X_sp.;
KF129745.1.1735_U	RNA	Alveolates-Ciliates	Spirotrichea	Eukaryota	Alveolata	Ciliophora	Spirotrichea	Strombidiida	Tontoniidae_B	Pseudotontonia	Pseudotontonia_sp.;
KF129788.1.1760_U	RNA	Alveolates-Syndiniales	Dino-Group-II	Eukaryota	Alveolata	Dinophyta	Syndiniales	Dino-Group-II	Dino-Group-II-Clade-12	Dino-Group-II-Clade-12_X	Dino-Group-II-Clade-12_X_sp.;
KF129830.1.1759_U	RNA	Alveolates-Syndiniales	Dino-Group-II	Eukaryota	Alveolata	Dinophyta	Syndiniales	Dino-Group-II	Dino-Group-II_X	Dino-Group-II_XX	Dino-Group-II_XX_sp.;
KF129831.1.1758_U	RNA	Alveolates-Dinoflagellates	Dinophyceae	Eukaryota	Alveolata	Dinophyta	Dinophyceae	Dinophyceae_X	Dinophyceae_XX	Dinophyceae_XXX	Dinophyceae_XXX_sp.;
KF129937.1.1759_U	RNA	Alveolates-Syndiniales	Dino-Group-II	Eukaryota	Alveolata	Dinophyta	Syndiniales	Dino-Group-II	Dino-Group-II-Clade-9	Dino-Group-II-Clade-9_X	Dino-Group-II-Clade-9_X_sp.;
KF130056.1.1743_U	RNA	Stramenopiles-Chrysophytes	Chrysophyceae_Clade-H	Eukaryota	Stramenopiles	Ochrophyta	Chrysophyceae	Chrysophyceae_X	Chrysophyceae_Clade-H	Chrysophyceae_Clade-H_X	Chrysophyceae_Clade-H_X_sp.;
KF130086.1.1747_U	RNA	Alveolates-Syndiniales	Dino-Group-I	Eukaryota	Alveolata	Dinophyta	Syndiniales	Dino-Group-I	Dino-Group-I-Clade-5	Dino-Group-I-Clade-5_X	Dino-Group-I-Clade-5_X_sp.;
KF130505	RNA	Haptophytes	Chrysochromulinaceae	Eukaryota	Hacrobia	Haptophyta	Prymnesiophyceae	Prymnesiales	Chrysochromulinaceae	Chrysochromulina	Chrysochromulina_sp.;
KF422619	RNA	Haptophytes	Calcidiscaceae	Eukaryota	Hacrobia	Haptophyta	Prymnesiophyceae	Coccolithales	Calcidiscaceae	Calcidiscus	Calcidiscus_leptoporus;
KF925339	RNA	Haptophytes	Phaeocystaceae	Eukaryota	Hacrobia	Haptophyta	Prymnesiophyceae	Phaeocystales	Phaeocystaceae	Phaeocystis	Phaeocystis_antarctica;
KJ757211.1.1741_U	RNA	Alveolates-Ciliates	Spirotrichea	Eukaryota	Alveolata	Ciliophora	Spirotrichea	Choreotrichida	Leegaardiellidae_B	Leegaardiella	Leegaardiella_sp.;
KJ757841.1.1804_U	RNA	Alveolates-Dinoflagellates	Gyrodinium	Eukaryota	Alveolata	Dinophyta	Dinophyceae	Dinophyceae_X	Dinophyceae_XX	Gyrodinium	Gyrodinium_fusiforme;
KJ757934.1.1798_U	RNA	Alveolates-Dinoflagellates	Gyrodinium	Eukaryota	Alveolata	Dinophyta	Dinophyceae	Dinophyceae_X	Dinophyceae_XX	Gyrodinium	Gyrodinium_sp.;
KJ758402.1.1777_U	RNA	Alveolates-Ciliates	Spirotrichea	Eukaryota	Alveolata	Ciliophora	Spirotrichea	Strombidiida_G	Strombidiida_G_X	Strombidiida_G_XX	Strombidiida_G_XX_sp.;
KJ758904.1.1796_U	RNA	Alveolates-Syndiniales	Dino-Group-II	Eukaryota	Alveolata	Dinophyta	Syndiniales	Dino-Group-II	Dino-Group-II_X	Dino-Group-II_XX	Dino-Group-II_XX_sp.;
KJ758919.1.1802_U	RNA	Alveolates-Dinoflagellates	Dinophyceae	Eukaryota	Alveolata	Dinophyta	Dinophyceae	Dinophyceae_X	Dinophyceae_XX	Dinophyceae_XXX	Dinophyceae_XXX_sp.;
KJ759121.1.1769_U	RNA	Alveolates-Ciliates	Spirotrichea	Eukaryota	Alveolata	Ciliophora	Spirotrichea	Strombidiida	Strombidiida_X	Strombidiida_XX	Strombidiida_XX_sp.;
KJ759269.1.1802_U	RNA	Alveolates-Dinoflagellates	Dinophyceae	Eukaryota	Alveolata	Dinophyta	Dinophyceae	Dinophyceae_X	Dinophyceae_XX	Dinophyceae_XXX	Dinophyceae_XXX_sp.;
KJ759326.1.1789_U	RNA	Opisthokonts-Other	Choanoflagellida	Eukaryota	Opisthokonta	Choanoflagellida	Choanoflagellida_X	Choanoflagellida_XX	Choanoflagellida_XXX	Choanoflagellida_XXXX	Choanoflagellida_XXXX_sp.;
KJ759375.1.1803_U	RNA	Opisthokont-Metazoa	Arthropoda	Eukaryota	Opisthokonta	Metazoa	Arthropoda	Crustacea	Maxillopoda	Maxillopoda_X	Maxillopoda_X_sp.;
KJ759387.1.1799_U	RNA	Alveolates-Syndiniales	Dino-Group-III	Eukaryota	Alveolata	Dinophyta	Syndiniales	Dino-Group-III	Dino-Group-III_X	Dino-Group-III_XX	Dino-Group-III_XX_sp.;
KJ759434.1.1797_U	RNA	Alveolates-Syndiniales	Dino-Group-II	Eukaryota	Alveolata	Dinophyta	Syndiniales	Dino-Group-II	Dino-Group-II_X	Dino-Group-II_XX	Dino-Group-II_XX_sp.;
KJ759457.1.1792_U	RNA	Opisthokonts-Other	Choanoflagellida	Eukaryota	Opisthokonta	Choanoflagellida	Choanoflagellida_X	Choanoflagellida_XX	Choanoflagellida_XXX	Choanoflagellida_XXXX	Choanoflagellida_XXXX_sp.;
KJ759474.1.1797_U	RNA	Alveolates-Dinoflagellates	Prorocentrum	Eukaryota	Alveolata	Dinophyta	Dinophyceae	Dinophyceae_X	Dinophyceae_XX	Prorocentrum	Prorocentrum_sp.;
KJ759590.1.1805_U	RNA	Stramenopiles-MAST	MAST-4	Eukaryota	Stramenopiles	Stramenopiles_X	MAST	MAST-4	MAST-4A	MAST-4A_X	MAST-4A_X_sp.;
KJ759631.1.1801_U	RNA	Alveolates-Dinoflagellates	Dinophyceae	Eukaryota	Alveolata	Dinophyta	Dinophyceae	Dinophyceae_X	Dinophyceae_XX	Dinophyceae_XXX	Dinophyceae_XXX_sp.;
KJ759676.1.1789_U	RNA	Alveolates-Dinoflagellates	Dinophyceae	Eukaryota	Alveolata	Dinophyta	Dinophyceae	Dinophyceae_X	Dinophyceae_XX	Dinophyceae_XXX	Dinophyceae_XXX_sp.;
KJ759703.1.1812_U	RNA	Opisthokont-Metazoa	Urochordata	Eukaryota	Opisthokonta	Metazoa	Urochordata	Urochordata_X	Appendicularia	Appendicularia_X	Appendicularia_X_sp.;
KJ760326.1.1800_U	RNA	Alveolates-Syndiniales	Dino-Group-II	Eukaryota	Alveolata	Dinophyta	Syndiniales	Dino-Group-II	Dino-Group-II-Clade-26	Dino-Group-II-Clade-26_X	Dino-Group-II-Clade-26_X_sp.;
KJ761067.1.1800_U	RNA	Alveolates-Dinoflagellates	Dinophyceae	Eukaryota	Alveolata	Dinophyta	Dinophyceae	Dinophyceae_X	Dinophyceae_XX	Dinophyceae_XXX	Dinophyceae_XXX_sp.;
KJ761088.1.1794_U	RNA	Alveolates-Syndiniales	Dino-Group-II	Eukaryota	Alveolata	Dinophyta	Syndiniales	Dino-Group-II	Dino-Group-II-Clade-15	Dino-Group-II-Clade-15_X	Dino-Group-II-Clade-15_X_sp.;
KJ761791.1.1776_U	RNA	Alveolates-Ciliates	Spirotrichea	Eukaryota	Alveolata	Ciliophora	Spirotrichea	Strombidiida	Strombidiida_X	Strombidiida_XX	Strombidiida_XX_sp.;
KJ762607.1.1723_U	RNA	Alveolates-Ciliates	Phyllopharyngea	Eukaryota	Alveolata	Ciliophora	Phyllopharyngea	Cyrtophoria	Chlamydodontidae	Chlamydodon	Chlamydodon_sp.;
KJ762895.1.1749_U	RNA	Alveolates-Ciliates	Colpodea	Eukaryota	Alveolata	Ciliophora	Colpodea	Colpodea-1	Colpodea-1_X	Colpodea-1_XX	Colpodea-1_XX_sp.;
KJ762965.1.1798_U	RNA	Alveolates-Dinoflagellates	Dinophyceae	Eukaryota	Alveolata	Dinophyta	Dinophyceae	Dinophyceae_X	Dinophyceae_XX	Dinophyceae_XXX	Dinophyceae_XXX_sp.;
KJ763347.1.1764_U	RNA	Alveolates-Ciliates	Spirotrichea	Eukaryota	Alveolata	Ciliophora	Spirotrichea	Strombidiida	Strombidiidae_L	Strombidiidae_L_X	Strombidiidae_L_X_sp.;
KJ763425.1.1797_U	RNA	Alveolates-Dinoflagellates	Dinophyceae	Eukaryota	Alveolata	Dinophyta	Dinophyceae	Dinophyceae_X	Dinophyceae_XX	Dinophyceae_XXX	Dinophyceae_XXX_sp.;
KJ763588.1.1798_U	RNA	Alveolates-Dinoflagellates	Dinophyceae	Eukaryota	Alveolata	Dinophyta	Dinophyceae	Dinophyceae_X	Dinophyceae_XX	Dinophyceae_XXX	Dinophyceae_XXX_sp.;
KJ764324.1.1802_U	RNA	Alveolates-Dinoflagellates	Dinophyceae	Eukaryota	Alveolata	Dinophyta	Dinophyceae	Dinophyceae_X	Dinophyceae_XX	Dinophyceae_XXX	Dinophyceae_XXX_sp.;
KJ764455.1.1796_U	RNA	Alveolates-Dinoflagellates	Dinophyceae	Eukaryota	Alveolata	Dinophyta	Dinophyceae	Dinophyceae_X	Dinophyceae_XX	Dinophyceae_XXX	Dinophyceae_XXX_sp.;
New.ReferenceOTU10	RNA	Unassigned	Other-unclassified	None	XXX	XXX	XXX	XXX	XXX	XXX	XXX
New.ReferenceOTU114	RNA	Unassigned	Other-unclassified	None	XXX	XXX	XXX	XXX	XXX	XXX	XXX
New.ReferenceOTU119	RNA	Unassigned	Other-unclassified	None	XXX	XXX	XXX	XXX	XXX	XXX	XXX
New.ReferenceOTU12	RNA	Unassigned	Other-unclassified	None	XXX	XXX	XXX	XXX	XXX	XXX	XXX
New.ReferenceOTU124	RNA	Unassigned	Other-unclassified	None	XXX	XXX	XXX	XXX	XXX	XXX	XXX
New.ReferenceOTU15	RNA	Unassigned	Other-unclassified	None	XXX	XXX	XXX	XXX	XXX	XXX	XXX
New.ReferenceOTU159	RNA	Unassigned	Other-unclassified	None	XXX	XXX	XXX	XXX	XXX	XXX	XXX
New.ReferenceOTU167	RNA	Unassigned	Other-unclassified	None	XXX	XXX	XXX	XXX	XXX	XXX	XXX
New.ReferenceOTU168	RNA	Unassigned	Other-unclassified	None	XXX	XXX	XXX	XXX	XXX	XXX	XXX
New.ReferenceOTU170	RNA	Unassigned	Other-unclassified	None	XXX	XXX	XXX	XXX	XXX	XXX	XXX
New.ReferenceOTU186	RNA	Unassigned	Other-unclassified	None	XXX	XXX	XXX	XXX	XXX	XXX	XXX
New.ReferenceOTU203	RNA	Unassigned	Other-unclassified	None	XXX	XXX	XXX	XXX	XXX	XXX	XXX
New.ReferenceOTU209	RNA	Unassigned	Other-unclassified	None	XXX	XXX	XXX	XXX	XXX	XXX	XXX
New.ReferenceOTU212	RNA	Unassigned	Other-unclassified	None	XXX	XXX	XXX	XXX	XXX	XXX	XXX
New.ReferenceOTU226	RNA	Unassigned	Other-unclassified	None	XXX	XXX	XXX	XXX	XXX	XXX	XXX
New.ReferenceOTU229	RNA	Unassigned	Other-unclassified	None	XXX	XXX	XXX	XXX	XXX	XXX	XXX
New.ReferenceOTU230	RNA	Unassigned	Other-unclassified	None	XXX	XXX	XXX	XXX	XXX	XXX	XXX
New.ReferenceOTU231	RNA	Unassigned	Other-unclassified	None	XXX	XXX	XXX	XXX	XXX	XXX	XXX
New.ReferenceOTU239	RNA	Unassigned	Other-unclassified	None	XXX	XXX	XXX	XXX	XXX	XXX	XXX
New.ReferenceOTU246	RNA	Unassigned	Other-unclassified	None	XXX	XXX	XXX	XXX	XXX	XXX	XXX
New.ReferenceOTU25	RNA	Unassigned	Other-unclassified	None	XXX	XXX	XXX	XXX	XXX	XXX	XXX
New.ReferenceOTU254	RNA	Unassigned	Other-unclassified	None	XXX	XXX	XXX	XXX	XXX	XXX	XXX
New.ReferenceOTU255	RNA	Unassigned	Other-unclassified	None	XXX	XXX	XXX	XXX	XXX	XXX	XXX
New.ReferenceOTU261	RNA	Unassigned	Other-unclassified	None	XXX	XXX	XXX	XXX	XXX	XXX	XXX
New.ReferenceOTU263	RNA	Unassigned	Other-unclassified	None	XXX	XXX	XXX	XXX	XXX	XXX	XXX
New.ReferenceOTU264	RNA	Unassigned	Other-unclassified	None	XXX	XXX	XXX	XXX	XXX	XXX	XXX
New.ReferenceOTU27	RNA	Unassigned	Other-unclassified	None	XXX	XXX	XXX	XXX	XXX	XXX	XXX
New.ReferenceOTU284	RNA	Unassigned	Other-unclassified	None	XXX	XXX	XXX	XXX	XXX	XXX	XXX
New.ReferenceOTU287	RNA	Unassigned	Other-unclassified	None	XXX	XXX	XXX	XXX	XXX	XXX	XXX
New.ReferenceOTU288	RNA	Unassigned	Other-unclassified	None	XXX	XXX	XXX	XXX	XXX	XXX	XXX
New.ReferenceOTU296	RNA	Unassigned	Other-unclassified	None	XXX	XXX	XXX	XXX	XXX	XXX	XXX
New.ReferenceOTU305	RNA	Unassigned	Other-unclassified	None	XXX	XXX	XXX	XXX	XXX	XXX	XXX
New.ReferenceOTU31	RNA	Unassigned	Other-unclassified	None	XXX	XXX	XXX	XXX	XXX	XXX	XXX
New.ReferenceOTU312	RNA	Unassigned	Other-unclassified	None	XXX	XXX	XXX	XXX	XXX	XXX	XXX
New.ReferenceOTU319	RNA	Unassigned	Other-unclassified	None	XXX	XXX	XXX	XXX	XXX	XXX	XXX
New.ReferenceOTU321	RNA	Unassigned	Other-unclassified	None	XXX	XXX	XXX	XXX	XXX	XXX	XXX
New.ReferenceOTU335	RNA	Unassigned	Other-unclassified	None	XXX	XXX	XXX	XXX	XXX	XXX	XXX
New.ReferenceOTU343	RNA	Unassigned	Other-unclassified	None	XXX	XXX	XXX	XXX	XXX	XXX	XXX
New.ReferenceOTU357	RNA	Unassigned	Other-unclassified	None	XXX	XXX	XXX	XXX	XXX	XXX	XXX
New.ReferenceOTU362	RNA	Unassigned	Other-unclassified	None	XXX	XXX	XXX	XXX	XXX	XXX	XXX
New.ReferenceOTU375	RNA	Unassigned	Other-unclassified	None	XXX	XXX	XXX	XXX	XXX	XXX	XXX
New.ReferenceOTU388	RNA	Unassigned	Other-unclassified	None	XXX	XXX	XXX	XXX	XXX	XXX	XXX
New.ReferenceOTU4	RNA	Unassigned	Other-unclassified	None	XXX	XXX	XXX	XXX	XXX	XXX	XXX
New.ReferenceOTU43	RNA	Unassigned	Other-unclassified	None	XXX	XXX	XXX	XXX	XXX	XXX	XXX
New.ReferenceOTU44	RNA	Unassigned	Other-unclassified	None	XXX	XXX	XXX	XXX	XXX	XXX	XXX
New.ReferenceOTU51	RNA	Unassigned	Other-unclassified	None	XXX	XXX	XXX	XXX	XXX	XXX	XXX
New.ReferenceOTU64	RNA	Unassigned	Other-unclassified	None	XXX	XXX	XXX	XXX	XXX	XXX	XXX
New.ReferenceOTU68	RNA	Unassigned	Other-unclassified	None	XXX	XXX	XXX	XXX	XXX	XXX	XXX
New.ReferenceOTU69	RNA	Unassigned	Other-unclassified	None	XXX	XXX	XXX	XXX	XXX	XXX	XXX
New.ReferenceOTU73	RNA	Unassigned	Other-unclassified	None	XXX	XXX	XXX	XXX	XXX	XXX	XXX
New.ReferenceOTU86	RNA	Unassigned	Other-unclassified	None	XXX	XXX	XXX	XXX	XXX	XXX	XXX
New.ReferenceOTU87	RNA	Unassigned	Other-unclassified	None	XXX	XXX	XXX	XXX	XXX	XXX	XXX
New.ReferenceOTU91	RNA	Unassigned	Other-unclassified	None	XXX	XXX	XXX	XXX	XXX	XXX	XXX
U42082.1.1721_U	RNA	Archaeplastids-Other	Heliconia	Eukaryota	Archaeplastida	Streptophyta	Embryophyceae	Embryophyceae_X	Embryophyceae_XX	Heliconia	Heliconia_indica;
